# Supplementary material
Source: Research Square preprint supplement (doi:10.21203/rs.3.rs-9546305/v1)
Supplement: Supplementary file 1 [file 7fa9b711d4ff9d56c09268b5.xlsx]

## Sheet: Information
Supplementary Data
Robust climate tests for fossil fuel supply under the Paris Agreement
Daniel Horen Greenford1, Corey Lesk2, Ashlee Barnes3, Jasmine Roha Wakefield3, Shannon Llyod4, H. Damon Matthews5
1 Department of Earth and Planetary Sciences, McGill University, Montreal, Québec, Canada.
2 Département des sciences de la Terre et de l'atmosphère, Université du Québec à Montréal, Montreal, Québec, Canada.
3 Uplift UK, United Kingdom.
4 Department of Management, Concordia University, Montreal, Québec, Canada.
5 Department of Geography, Planning and Environment, Concordia University, Montreal, Québec, Canada.
Draft: April 26, 2026
Figures from main text
1. Figure 2 | UK oil and gas potential production (a) and climate benchmarks (b)
2. Figure 3 | Climate test results for UK oil (left) and gas (right)
Supplementary results
3. Figure S1 | Test subjects: All test subject orderings and emissions
4. Figure S2 | Climate tests: All climate test results
5. Table S2 | Remaining carbon budgets
6. Table S3 | Committed emissions results
Source data
7. UK oil and gas reserves and resources
Units
All units are in billion tonnes (Gt) carbon dioxide (CO2) unless otherwise stated.

## Sheet: 1-Fig_2
Fig 2a
Production_Scenario	Fuel	Reserves	Rosebank (Phase 1)	Jackdaw	Producing fields	Cambo	Rosebank (Phase 2)	Proposed new developments	Licensed marginal discoveries	Unlicensed marginal discoveries	TOTAL
central	Oil	0.74512	0.0915	0.0038	0.4186	0.0902	0.0392	0.42766	0.35742	0.50232	2.67582
eia	Oil	0.74512	0.1313	0.0061	0.55384	0.0902	0.0563	0.4975	0.79534	0.99498	3.87068
upper	Oil	0.88978	0.1313	0.0061	0.55384	0.0902	0.0563	0.4975	0.79534	0.99498	4.01534
central	Gas	0.274327	0.0107	0.0171	0.126567	0.0038	0.0046	0.0487592	0.193933	0.283755	0.963541
eia	Gas	0.274327	0.0147	0.0259	0.157188	0.0038	0.0063	0.0674732	0.357245	0.520557	1.42749
upper	Gas	0.35339	0.0147	0.0259	0.157188	0.0038	0.0063	0.0674732	0.357245	0.520557	1.50655
Fig 2b
Benchmarks	Target	Oil	Gas
Cost-optimal	1.7ºC (83%)	1.34	0.58
Cost-optimal	1.5ºC (50%)	0.61	0.26
Current trends	1.7ºC (67%)	1.45	0.63
Current trends	1.5ºC (50%)	0.35	0.15
Equity via partial reallocation	1.7ºC (67%)	1.01	0.44
Equity via partial reallocation	1.5ºC (50%)	0.24	0.11
Equity via full reallocation	1.7ºC (67%)	0.76	0.33
Equity via full reallocation	1.5ºC (50%)	0.18	0.08

## Sheet: 2-Fig_3
Benchmark	Fuel	1. Reserves	2. Rosebank 1	3. Jackdaw	4. Producing	5. Cambo	6. Rosebank 2	7. Proposed	8. Licensed	9. Unlicensed
Cost-optimal 1.7ºC (83%)	Oil	0.55606	0.654045	0.658597	1.07191	1.13922	1.18124	1.55251	2.14604	2.88857
Cost-optimal 1.5ºC (50%)	Oil	1.22151	1.43675	1.44675	2.35469	2.50256	2.59485	3.41043	4.71426	6.34538
Current trends 1.7ºC (67%)	Oil	0.513876	0.604428	0.608634	0.990593	1.0528	1.09163	1.43473	1.98324	2.66943
Current trends 1.5ºC (50%)	Oil	2.12891	2.50406	2.52149	4.10389	4.3616	4.52246	5.94389	8.21629	11.0591
Equity via partial reallocation 1.7ºC (67%)	Oil	0.737743	0.867743	0.873782	1.42214	1.51145	1.56719	2.05976	2.84723	3.83236
Equity via partial reallocation 1.5ºC (50%)	Oil	3.10467	3.65175	3.67717	5.98483	6.36067	6.59525	8.66817	11.9821	16.1278
Equity via full reallocation 1.7ºC (67%)	Oil	0.980421	1.15318	1.16121	1.88995	2.00863	2.08271	2.73732	3.78382	5.093
Equity via full reallocation 1.5ºC (50%)	Oil	4.13956	4.869	4.90289	7.97978	8.48089	8.79367	11.5576	15.9761	21.5038
Cost-optimal 1.7ºC (83%)	Gas	0.472978	0.498323	0.542978	0.813991	0.820543	0.831405	0.947738	1.56368	2.46119
Cost-optimal 1.5ºC (50%)	Gas	1.0551	1.11164	1.21126	1.81583	1.83044	1.85467	2.11419	3.4882	5.49035
Current trends 1.7ºC (67%)	Gas	0.43544	0.458773	0.499884	0.749389	0.755421	0.765421	0.872521	1.43958	2.26586
Current trends 1.5ºC (50%)	Gas	1.82885	1.92685	2.09951	3.14743	3.17277	3.21477	3.66459	6.04622	9.5166
Equity via partial reallocation 1.7ºC (67%)	Gas	0.623471	0.65688	0.715744	1.07299	1.08163	1.09594	1.24929	2.06121	3.2443
Equity via partial reallocation 1.5ºC (50%)	Gas	2.49388	2.62752	2.86297	4.29195	4.3265	4.38377	4.99717	8.24485	12.9772
Equity via full reallocation 1.7ºC (67%)	Gas	0.831295	0.87584	0.954325	1.43065	1.44217	1.46126	1.66572	2.74828	4.32573
Equity via full reallocation 1.5ºC (50%)	Gas	3.42909	3.61284	3.93659	5.90144	5.94894	6.02769	6.8711	11.3367	17.8436

## Sheet: 3-Test_Subjects
Production_Scenario	Ordering_Scenario	Fuel	assignment_id	ordering_id	assignment	ordering	Rosebank (Phase 1)	Jackdaw	Reserves	Producing fields	Cambo	Rosebank (Phase 2)	Proposed new developments	Licensed marginal discoveries	Unlicensed marginal discoveries	TOTAL
central	Scenario_1	Oil	3	0	{'Rosebank (Phase 1)': 'Contingent resources in proposed new developments', 'Jackdaw': 'Contingent resources in proposed new developments', 'Cambo': 'Contingent resources in proposed new developments', 'Rosebank (Phase 2)': 'Contingent resources in proposed new developments'}	{'Proposed new developments': ['Rosebank (Phase 1)', 'Jackdaw', 'Cambo', 'Rosebank (Phase 2)']}	91.5	3.8	840.42	418.6	90.2	39.2	332.36	357.42	502.32	2675.82
central	Scenario_2	Oil	3	6	{'Rosebank (Phase 1)': 'Contingent resources in proposed new developments', 'Jackdaw': 'Contingent resources in proposed new developments', 'Cambo': 'Contingent resources in proposed new developments', 'Rosebank (Phase 2)': 'Contingent resources in proposed new developments'}	{'Proposed new developments': ['Jackdaw', 'Rosebank (Phase 1)', 'Cambo', 'Rosebank (Phase 2)']}	91.5	3.8	840.42	418.6	90.2	39.2	332.36	357.42	502.32	2675.82
central	Scenario_3	Oil	3	0	{'Rosebank (Phase 1)': 'Contingent resources in proposed new developments', 'Jackdaw': 'Contingent resources in proposed new developments', 'Cambo': 'Contingent resources in proposed new developments', 'Rosebank (Phase 2)': 'Contingent resources in proposed new developments'}	{'Proposed new developments': ['Rosebank (Phase 1)', 'Jackdaw', 'Cambo', 'Rosebank (Phase 2)']}	91.5	3.8	840.42	418.6	90.2	39.2	332.36	357.42	502.32	2675.82
central	Scenario_4	Oil	3	6	{'Rosebank (Phase 1)': 'Contingent resources in proposed new developments', 'Jackdaw': 'Contingent resources in proposed new developments', 'Cambo': 'Contingent resources in proposed new developments', 'Rosebank (Phase 2)': 'Contingent resources in proposed new developments'}	{'Proposed new developments': ['Jackdaw', 'Rosebank (Phase 1)', 'Cambo', 'Rosebank (Phase 2)']}	91.5	3.8	840.42	418.6	90.2	39.2	332.36	357.42	502.32	2675.82
central	Scenario_5	Oil	0	0	{'Rosebank (Phase 1)': 'Reserves', 'Jackdaw': 'Reserves', 'Cambo': 'Contingent resources in proposed new developments', 'Rosebank (Phase 2)': 'Contingent resources in proposed new developments'}	{'Reserves': ['Rosebank (Phase 1)', 'Jackdaw'], 'Proposed new developments': ['Cambo', 'Rosebank (Phase 2)']}	91.5	3.8	745.12	418.6	90.2	39.2	427.66	357.42	502.32	2675.82
central	Scenario_6	Oil	0	2	{'Rosebank (Phase 1)': 'Reserves', 'Jackdaw': 'Reserves', 'Cambo': 'Contingent resources in proposed new developments', 'Rosebank (Phase 2)': 'Contingent resources in proposed new developments'}	{'Reserves': ['Jackdaw', 'Rosebank (Phase 1)'], 'Proposed new developments': ['Cambo', 'Rosebank (Phase 2)']}	91.5	3.8	745.12	418.6	90.2	39.2	427.66	357.42	502.32	2675.82
central	Scenario_7	Oil	0	0	{'Rosebank (Phase 1)': 'Reserves', 'Jackdaw': 'Reserves', 'Cambo': 'Contingent resources in proposed new developments', 'Rosebank (Phase 2)': 'Contingent resources in proposed new developments'}	{'Reserves': ['Rosebank (Phase 1)', 'Jackdaw'], 'Proposed new developments': ['Cambo', 'Rosebank (Phase 2)']}	91.5	3.8	745.12	418.6	90.2	39.2	427.66	357.42	502.32	2675.82
central	Scenario_8	Oil	0	2	{'Rosebank (Phase 1)': 'Reserves', 'Jackdaw': 'Reserves', 'Cambo': 'Contingent resources in proposed new developments', 'Rosebank (Phase 2)': 'Contingent resources in proposed new developments'}	{'Reserves': ['Jackdaw', 'Rosebank (Phase 1)'], 'Proposed new developments': ['Cambo', 'Rosebank (Phase 2)']}	91.5	3.8	745.12	418.6	90.2	39.2	427.66	357.42	502.32	2675.82
eia	Scenario_1	Oil	3	0	{'Rosebank (Phase 1)': 'Contingent resources in proposed new developments', 'Jackdaw': 'Contingent resources in proposed new developments', 'Cambo': 'Contingent resources in proposed new developments', 'Rosebank (Phase 2)': 'Contingent resources in proposed new developments'}	{'Proposed new developments': ['Rosebank (Phase 1)', 'Jackdaw', 'Cambo', 'Rosebank (Phase 2)']}	131.3	6.1	840.42	553.84	90.2	56.3	360.1	795.34	994.98	3828.58
eia	Scenario_2	Oil	3	6	{'Rosebank (Phase 1)': 'Contingent resources in proposed new developments', 'Jackdaw': 'Contingent resources in proposed new developments', 'Cambo': 'Contingent resources in proposed new developments', 'Rosebank (Phase 2)': 'Contingent resources in proposed new developments'}	{'Proposed new developments': ['Jackdaw', 'Rosebank (Phase 1)', 'Cambo', 'Rosebank (Phase 2)']}	131.3	6.1	840.42	553.84	90.2	56.3	360.1	795.34	994.98	3828.58
eia	Scenario_3	Oil	3	0	{'Rosebank (Phase 1)': 'Contingent resources in proposed new developments', 'Jackdaw': 'Contingent resources in proposed new developments', 'Cambo': 'Contingent resources in proposed new developments', 'Rosebank (Phase 2)': 'Contingent resources in proposed new developments'}	{'Proposed new developments': ['Rosebank (Phase 1)', 'Jackdaw', 'Cambo', 'Rosebank (Phase 2)']}	131.3	6.1	840.42	553.84	90.2	56.3	360.1	795.34	994.98	3828.58
eia	Scenario_4	Oil	3	6	{'Rosebank (Phase 1)': 'Contingent resources in proposed new developments', 'Jackdaw': 'Contingent resources in proposed new developments', 'Cambo': 'Contingent resources in proposed new developments', 'Rosebank (Phase 2)': 'Contingent resources in proposed new developments'}	{'Proposed new developments': ['Jackdaw', 'Rosebank (Phase 1)', 'Cambo', 'Rosebank (Phase 2)']}	131.3	6.1	840.42	553.84	90.2	56.3	360.1	795.34	994.98	3828.58
eia	Scenario_5	Oil	0	0	{'Rosebank (Phase 1)': 'Reserves', 'Jackdaw': 'Reserves', 'Cambo': 'Contingent resources in proposed new developments', 'Rosebank (Phase 2)': 'Contingent resources in proposed new developments'}	{'Reserves': ['Rosebank (Phase 1)', 'Jackdaw'], 'Proposed new developments': ['Cambo', 'Rosebank (Phase 2)']}	131.3	6.1	745.12	553.84	90.2	56.3	497.5	795.34	994.98	3870.68
eia	Scenario_6	Oil	0	2	{'Rosebank (Phase 1)': 'Reserves', 'Jackdaw': 'Reserves', 'Cambo': 'Contingent resources in proposed new developments', 'Rosebank (Phase 2)': 'Contingent resources in proposed new developments'}	{'Reserves': ['Jackdaw', 'Rosebank (Phase 1)'], 'Proposed new developments': ['Cambo', 'Rosebank (Phase 2)']}	131.3	6.1	745.12	553.84	90.2	56.3	497.5	795.34	994.98	3870.68
eia	Scenario_7	Oil	0	0	{'Rosebank (Phase 1)': 'Reserves', 'Jackdaw': 'Reserves', 'Cambo': 'Contingent resources in proposed new developments', 'Rosebank (Phase 2)': 'Contingent resources in proposed new developments'}	{'Reserves': ['Rosebank (Phase 1)', 'Jackdaw'], 'Proposed new developments': ['Cambo', 'Rosebank (Phase 2)']}	131.3	6.1	745.12	553.84	90.2	56.3	497.5	795.34	994.98	3870.68
eia	Scenario_8	Oil	0	2	{'Rosebank (Phase 1)': 'Reserves', 'Jackdaw': 'Reserves', 'Cambo': 'Contingent resources in proposed new developments', 'Rosebank (Phase 2)': 'Contingent resources in proposed new developments'}	{'Reserves': ['Jackdaw', 'Rosebank (Phase 1)'], 'Proposed new developments': ['Cambo', 'Rosebank (Phase 2)']}	131.3	6.1	745.12	553.84	90.2	56.3	497.5	795.34	994.98	3870.68
upper	Scenario_1	Oil	3	0	{'Rosebank (Phase 1)': 'Contingent resources in proposed new developments', 'Jackdaw': 'Contingent resources in proposed new developments', 'Cambo': 'Contingent resources in proposed new developments', 'Rosebank (Phase 2)': 'Contingent resources in proposed new developments'}	{'Proposed new developments': ['Rosebank (Phase 1)', 'Jackdaw', 'Cambo', 'Rosebank (Phase 2)']}	131.3	6.1	1027.18	553.84	90.2	56.3	360.1	795.34	994.98	4015.34
upper	Scenario_2	Oil	3	6	{'Rosebank (Phase 1)': 'Contingent resources in proposed new developments', 'Jackdaw': 'Contingent resources in proposed new developments', 'Cambo': 'Contingent resources in proposed new developments', 'Rosebank (Phase 2)': 'Contingent resources in proposed new developments'}	{'Proposed new developments': ['Jackdaw', 'Rosebank (Phase 1)', 'Cambo', 'Rosebank (Phase 2)']}	131.3	6.1	1027.18	553.84	90.2	56.3	360.1	795.34	994.98	4015.34
upper	Scenario_3	Oil	3	0	{'Rosebank (Phase 1)': 'Contingent resources in proposed new developments', 'Jackdaw': 'Contingent resources in proposed new developments', 'Cambo': 'Contingent resources in proposed new developments', 'Rosebank (Phase 2)': 'Contingent resources in proposed new developments'}	{'Proposed new developments': ['Rosebank (Phase 1)', 'Jackdaw', 'Cambo', 'Rosebank (Phase 2)']}	131.3	6.1	1027.18	553.84	90.2	56.3	360.1	795.34	994.98	4015.34
upper	Scenario_4	Oil	3	6	{'Rosebank (Phase 1)': 'Contingent resources in proposed new developments', 'Jackdaw': 'Contingent resources in proposed new developments', 'Cambo': 'Contingent resources in proposed new developments', 'Rosebank (Phase 2)': 'Contingent resources in proposed new developments'}	{'Proposed new developments': ['Jackdaw', 'Rosebank (Phase 1)', 'Cambo', 'Rosebank (Phase 2)']}	131.3	6.1	1027.18	553.84	90.2	56.3	360.1	795.34	994.98	4015.34
upper	Scenario_5	Oil	0	0	{'Rosebank (Phase 1)': 'Reserves', 'Jackdaw': 'Reserves', 'Cambo': 'Contingent resources in proposed new developments', 'Rosebank (Phase 2)': 'Contingent resources in proposed new developments'}	{'Reserves': ['Rosebank (Phase 1)', 'Jackdaw'], 'Proposed new developments': ['Cambo', 'Rosebank (Phase 2)']}	131.3	6.1	889.78	553.84	90.2	56.3	497.5	795.34	994.98	4015.34
upper	Scenario_6	Oil	0	2	{'Rosebank (Phase 1)': 'Reserves', 'Jackdaw': 'Reserves', 'Cambo': 'Contingent resources in proposed new developments', 'Rosebank (Phase 2)': 'Contingent resources in proposed new developments'}	{'Reserves': ['Jackdaw', 'Rosebank (Phase 1)'], 'Proposed new developments': ['Cambo', 'Rosebank (Phase 2)']}	131.3	6.1	889.78	553.84	90.2	56.3	497.5	795.34	994.98	4015.34
upper	Scenario_7	Oil	0	0	{'Rosebank (Phase 1)': 'Reserves', 'Jackdaw': 'Reserves', 'Cambo': 'Contingent resources in proposed new developments', 'Rosebank (Phase 2)': 'Contingent resources in proposed new developments'}	{'Reserves': ['Rosebank (Phase 1)', 'Jackdaw'], 'Proposed new developments': ['Cambo', 'Rosebank (Phase 2)']}	131.3	6.1	889.78	553.84	90.2	56.3	497.5	795.34	994.98	4015.34
upper	Scenario_8	Oil	0	2	{'Rosebank (Phase 1)': 'Reserves', 'Jackdaw': 'Reserves', 'Cambo': 'Contingent resources in proposed new developments', 'Rosebank (Phase 2)': 'Contingent resources in proposed new developments'}	{'Reserves': ['Jackdaw', 'Rosebank (Phase 1)'], 'Proposed new developments': ['Cambo', 'Rosebank (Phase 2)']}	131.3	6.1	889.78	553.84	90.2	56.3	497.5	795.34	994.98	4015.34
central	Scenario_1	Gas	3	0	{'Rosebank (Phase 1)': 'Contingent resources in proposed new developments', 'Jackdaw': 'Contingent resources in proposed new developments', 'Cambo': 'Contingent resources in proposed new developments', 'Rosebank (Phase 2)': 'Contingent resources in proposed new developments'}	{'Proposed new developments': ['Rosebank (Phase 1)', 'Jackdaw', 'Cambo', 'Rosebank (Phase 2)']}	10.7	17.1	302.127	126.567	3.8	4.6	20.9592	193.933	283.755	963.541
central	Scenario_2	Gas	3	6	{'Rosebank (Phase 1)': 'Contingent resources in proposed new developments', 'Jackdaw': 'Contingent resources in proposed new developments', 'Cambo': 'Contingent resources in proposed new developments', 'Rosebank (Phase 2)': 'Contingent resources in proposed new developments'}	{'Proposed new developments': ['Jackdaw', 'Rosebank (Phase 1)', 'Cambo', 'Rosebank (Phase 2)']}	10.7	17.1	302.127	126.567	3.8	4.6	20.9592	193.933	283.755	963.541
central	Scenario_3	Gas	3	0	{'Rosebank (Phase 1)': 'Contingent resources in proposed new developments', 'Jackdaw': 'Contingent resources in proposed new developments', 'Cambo': 'Contingent resources in proposed new developments', 'Rosebank (Phase 2)': 'Contingent resources in proposed new developments'}	{'Proposed new developments': ['Rosebank (Phase 1)', 'Jackdaw', 'Cambo', 'Rosebank (Phase 2)']}	10.7	17.1	302.127	126.567	3.8	4.6	20.9592	193.933	283.755	963.541
central	Scenario_4	Gas	3	6	{'Rosebank (Phase 1)': 'Contingent resources in proposed new developments', 'Jackdaw': 'Contingent resources in proposed new developments', 'Cambo': 'Contingent resources in proposed new developments', 'Rosebank (Phase 2)': 'Contingent resources in proposed new developments'}	{'Proposed new developments': ['Jackdaw', 'Rosebank (Phase 1)', 'Cambo', 'Rosebank (Phase 2)']}	10.7	17.1	302.127	126.567	3.8	4.6	20.9592	193.933	283.755	963.541
central	Scenario_5	Gas	0	0	{'Rosebank (Phase 1)': 'Reserves', 'Jackdaw': 'Reserves', 'Cambo': 'Contingent resources in proposed new developments', 'Rosebank (Phase 2)': 'Contingent resources in proposed new developments'}	{'Reserves': ['Rosebank (Phase 1)', 'Jackdaw'], 'Proposed new developments': ['Cambo', 'Rosebank (Phase 2)']}	10.7	17.1	274.327	126.567	3.8	4.6	48.7592	193.933	283.755	963.541
central	Scenario_6	Gas	0	2	{'Rosebank (Phase 1)': 'Reserves', 'Jackdaw': 'Reserves', 'Cambo': 'Contingent resources in proposed new developments', 'Rosebank (Phase 2)': 'Contingent resources in proposed new developments'}	{'Reserves': ['Jackdaw', 'Rosebank (Phase 1)'], 'Proposed new developments': ['Cambo', 'Rosebank (Phase 2)']}	10.7	17.1	274.327	126.567	3.8	4.6	48.7592	193.933	283.755	963.541
central	Scenario_7	Gas	0	0	{'Rosebank (Phase 1)': 'Reserves', 'Jackdaw': 'Reserves', 'Cambo': 'Contingent resources in proposed new developments', 'Rosebank (Phase 2)': 'Contingent resources in proposed new developments'}	{'Reserves': ['Rosebank (Phase 1)', 'Jackdaw'], 'Proposed new developments': ['Cambo', 'Rosebank (Phase 2)']}	10.7	17.1	274.327	126.567	3.8	4.6	48.7592	193.933	283.755	963.541
central	Scenario_8	Gas	0	2	{'Rosebank (Phase 1)': 'Reserves', 'Jackdaw': 'Reserves', 'Cambo': 'Contingent resources in proposed new developments', 'Rosebank (Phase 2)': 'Contingent resources in proposed new developments'}	{'Reserves': ['Jackdaw', 'Rosebank (Phase 1)'], 'Proposed new developments': ['Cambo', 'Rosebank (Phase 2)']}	10.7	17.1	274.327	126.567	3.8	4.6	48.7592	193.933	283.755	963.541
eia	Scenario_1	Gas	3	0	{'Rosebank (Phase 1)': 'Contingent resources in proposed new developments', 'Jackdaw': 'Contingent resources in proposed new developments', 'Cambo': 'Contingent resources in proposed new developments', 'Rosebank (Phase 2)': 'Contingent resources in proposed new developments'}	{'Proposed new developments': ['Rosebank (Phase 1)', 'Jackdaw', 'Cambo', 'Rosebank (Phase 2)']}	14.7	25.9	302.127	157.188	3.8	6.3	26.8732	357.245	520.557	1414.69
eia	Scenario_2	Gas	3	6	{'Rosebank (Phase 1)': 'Contingent resources in proposed new developments', 'Jackdaw': 'Contingent resources in proposed new developments', 'Cambo': 'Contingent resources in proposed new developments', 'Rosebank (Phase 2)': 'Contingent resources in proposed new developments'}	{'Proposed new developments': ['Jackdaw', 'Rosebank (Phase 1)', 'Cambo', 'Rosebank (Phase 2)']}	14.7	25.9	302.127	157.188	3.8	6.3	26.8732	357.245	520.557	1414.69
eia	Scenario_3	Gas	3	0	{'Rosebank (Phase 1)': 'Contingent resources in proposed new developments', 'Jackdaw': 'Contingent resources in proposed new developments', 'Cambo': 'Contingent resources in proposed new developments', 'Rosebank (Phase 2)': 'Contingent resources in proposed new developments'}	{'Proposed new developments': ['Rosebank (Phase 1)', 'Jackdaw', 'Cambo', 'Rosebank (Phase 2)']}	14.7	25.9	302.127	157.188	3.8	6.3	26.8732	357.245	520.557	1414.69
eia	Scenario_4	Gas	3	6	{'Rosebank (Phase 1)': 'Contingent resources in proposed new developments', 'Jackdaw': 'Contingent resources in proposed new developments', 'Cambo': 'Contingent resources in proposed new developments', 'Rosebank (Phase 2)': 'Contingent resources in proposed new developments'}	{'Proposed new developments': ['Jackdaw', 'Rosebank (Phase 1)', 'Cambo', 'Rosebank (Phase 2)']}	14.7	25.9	302.127	157.188	3.8	6.3	26.8732	357.245	520.557	1414.69
eia	Scenario_5	Gas	0	0	{'Rosebank (Phase 1)': 'Reserves', 'Jackdaw': 'Reserves', 'Cambo': 'Contingent resources in proposed new developments', 'Rosebank (Phase 2)': 'Contingent resources in proposed new developments'}	{'Reserves': ['Rosebank (Phase 1)', 'Jackdaw'], 'Proposed new developments': ['Cambo', 'Rosebank (Phase 2)']}	14.7	25.9	274.327	157.188	3.8	6.3	67.4732	357.245	520.557	1427.49
eia	Scenario_6	Gas	0	2	{'Rosebank (Phase 1)': 'Reserves', 'Jackdaw': 'Reserves', 'Cambo': 'Contingent resources in proposed new developments', 'Rosebank (Phase 2)': 'Contingent resources in proposed new developments'}	{'Reserves': ['Jackdaw', 'Rosebank (Phase 1)'], 'Proposed new developments': ['Cambo', 'Rosebank (Phase 2)']}	14.7	25.9	274.327	157.188	3.8	6.3	67.4732	357.245	520.557	1427.49
eia	Scenario_7	Gas	0	0	{'Rosebank (Phase 1)': 'Reserves', 'Jackdaw': 'Reserves', 'Cambo': 'Contingent resources in proposed new developments', 'Rosebank (Phase 2)': 'Contingent resources in proposed new developments'}	{'Reserves': ['Rosebank (Phase 1)', 'Jackdaw'], 'Proposed new developments': ['Cambo', 'Rosebank (Phase 2)']}	14.7	25.9	274.327	157.188	3.8	6.3	67.4732	357.245	520.557	1427.49
eia	Scenario_8	Gas	0	2	{'Rosebank (Phase 1)': 'Reserves', 'Jackdaw': 'Reserves', 'Cambo': 'Contingent resources in proposed new developments', 'Rosebank (Phase 2)': 'Contingent resources in proposed new developments'}	{'Reserves': ['Jackdaw', 'Rosebank (Phase 1)'], 'Proposed new developments': ['Cambo', 'Rosebank (Phase 2)']}	14.7	25.9	274.327	157.188	3.8	6.3	67.4732	357.245	520.557	1427.49
upper	Scenario_1	Gas	3	0	{'Rosebank (Phase 1)': 'Contingent resources in proposed new developments', 'Jackdaw': 'Contingent resources in proposed new developments', 'Cambo': 'Contingent resources in proposed new developments', 'Rosebank (Phase 2)': 'Contingent resources in proposed new developments'}	{'Proposed new developments': ['Rosebank (Phase 1)', 'Jackdaw', 'Cambo', 'Rosebank (Phase 2)']}	14.7	25.9	393.99	157.188	3.8	6.3	26.8732	357.245	520.557	1506.55
upper	Scenario_2	Gas	3	6	{'Rosebank (Phase 1)': 'Contingent resources in proposed new developments', 'Jackdaw': 'Contingent resources in proposed new developments', 'Cambo': 'Contingent resources in proposed new developments', 'Rosebank (Phase 2)': 'Contingent resources in proposed new developments'}	{'Proposed new developments': ['Jackdaw', 'Rosebank (Phase 1)', 'Cambo', 'Rosebank (Phase 2)']}	14.7	25.9	393.99	157.188	3.8	6.3	26.8732	357.245	520.557	1506.55
upper	Scenario_3	Gas	3	0	{'Rosebank (Phase 1)': 'Contingent resources in proposed new developments', 'Jackdaw': 'Contingent resources in proposed new developments', 'Cambo': 'Contingent resources in proposed new developments', 'Rosebank (Phase 2)': 'Contingent resources in proposed new developments'}	{'Proposed new developments': ['Rosebank (Phase 1)', 'Jackdaw', 'Cambo', 'Rosebank (Phase 2)']}	14.7	25.9	393.99	157.188	3.8	6.3	26.8732	357.245	520.557	1506.55
upper	Scenario_4	Gas	3	6	{'Rosebank (Phase 1)': 'Contingent resources in proposed new developments', 'Jackdaw': 'Contingent resources in proposed new developments', 'Cambo': 'Contingent resources in proposed new developments', 'Rosebank (Phase 2)': 'Contingent resources in proposed new developments'}	{'Proposed new developments': ['Jackdaw', 'Rosebank (Phase 1)', 'Cambo', 'Rosebank (Phase 2)']}	14.7	25.9	393.99	157.188	3.8	6.3	26.8732	357.245	520.557	1506.55
upper	Scenario_5	Gas	0	0	{'Rosebank (Phase 1)': 'Reserves', 'Jackdaw': 'Reserves', 'Cambo': 'Contingent resources in proposed new developments', 'Rosebank (Phase 2)': 'Contingent resources in proposed new developments'}	{'Reserves': ['Rosebank (Phase 1)', 'Jackdaw'], 'Proposed new developments': ['Cambo', 'Rosebank (Phase 2)']}	14.7	25.9	353.39	157.188	3.8	6.3	67.4732	357.245	520.557	1506.55
upper	Scenario_6	Gas	0	2	{'Rosebank (Phase 1)': 'Reserves', 'Jackdaw': 'Reserves', 'Cambo': 'Contingent resources in proposed new developments', 'Rosebank (Phase 2)': 'Contingent resources in proposed new developments'}	{'Reserves': ['Jackdaw', 'Rosebank (Phase 1)'], 'Proposed new developments': ['Cambo', 'Rosebank (Phase 2)']}	14.7	25.9	353.39	157.188	3.8	6.3	67.4732	357.245	520.557	1506.55
upper	Scenario_7	Gas	0	0	{'Rosebank (Phase 1)': 'Reserves', 'Jackdaw': 'Reserves', 'Cambo': 'Contingent resources in proposed new developments', 'Rosebank (Phase 2)': 'Contingent resources in proposed new developments'}	{'Reserves': ['Rosebank (Phase 1)', 'Jackdaw'], 'Proposed new developments': ['Cambo', 'Rosebank (Phase 2)']}	14.7	25.9	353.39	157.188	3.8	6.3	67.4732	357.245	520.557	1506.55
upper	Scenario_8	Gas	0	2	{'Rosebank (Phase 1)': 'Reserves', 'Jackdaw': 'Reserves', 'Cambo': 'Contingent resources in proposed new developments', 'Rosebank (Phase 2)': 'Contingent resources in proposed new developments'}	{'Reserves': ['Jackdaw', 'Rosebank (Phase 1)'], 'Proposed new developments': ['Cambo', 'Rosebank (Phase 2)']}	14.7	25.9	353.39	157.188	3.8	6.3	67.4732	357.245	520.557	1506.55

## Sheet: 4-Climate_Tests
Benchmark	Ordering_Scenario	Fuel	Production_Scenario	1. Reserves	2. Producing	3. Proposed	4. Rosebank 1	5. Jackdaw	6. Cambo	7. Rosebank 2	8. Licensed	9. Unlicensed	4. Jackdaw	5. Rosebank 1	3. Rosebank 1	5. Cambo	6. Rosebank 2	7. Proposed	3. Jackdaw	2. Rosebank 1	4. Producing	5. Proposed	2. Jackdaw
Cost-optimal 1.7ºC (83%)	Scenario_1	Oil	Central	0.627179	0.939567	1.1876	1.25588	1.25872	1.32603	1.35528	1.62201	1.99688
Cost-optimal 1.5ºC (50%)	Scenario_1	Oil	Central	1.37774	2.06397	2.60882	2.75882	2.76505	2.91292	2.97718	3.56311	4.38659
Current trends 1.7ºC (67%)	Scenario_1	Oil	Central	0.5796	0.86829	1.0975	1.16061	1.16323	1.22543	1.25247	1.49897	1.84539
Current trends 1.5ºC (50%)	Scenario_1	Oil	Central	2.4012	3.5972	4.5468	4.80823	4.81909	5.0768	5.1888	6.21	7.6452
Equity via partial reallocation 1.7ºC (67%)	Scenario_1	Oil	Central	0.832099	1.24655	1.57562	1.66622	1.66998	1.75929	1.7981	2.15198	2.64933
Equity via partial reallocation 1.5ºC (50%)	Scenario_1	Oil	Central	3.50175	5.24592	6.63075	7.012	7.02783	7.40367	7.567	9.05625	11.1493
Equity via full reallocation 1.7ºC (67%)	Scenario_1	Oil	Central	1.10582	1.65661	2.09392	2.21432	2.21932	2.338	2.38958	2.85987	3.52082
Equity via full reallocation 1.5ºC (50%)	Scenario_1	Oil	Central	4.669	6.99456	8.841	9.34933	9.37044	9.87156	10.0893	12.075	14.8657
Cost-optimal 1.7ºC (83%)	Scenario_1	Oil	EIA	0.627179	1.04049	1.30922	1.40721	1.41176	1.47907	1.52109	2.11463	2.85715
Cost-optimal 1.5ºC (50%)	Scenario_1	Oil	EIA	1.37774	2.28567	2.876	3.09125	3.10125	3.24911	3.34141	4.64525	6.27636
Current trends 1.7ºC (67%)	Scenario_1	Oil	EIA	0.5796	0.961559	1.2099	1.30046	1.30466	1.36687	1.4057	1.95421	2.6404
Current trends 1.5ºC (50%)	Scenario_1	Oil	EIA	2.4012	3.9836	5.01246	5.3876	5.40503	5.66274	5.8236	8.096	10.9388
Equity via partial reallocation 1.7ºC (67%)	Scenario_1	Oil	EIA	0.832099	1.38046	1.73699	1.86699	1.87303	1.96234	2.01808	2.80554	3.79067
Equity via partial reallocation 1.5ºC (50%)	Scenario_1	Oil	EIA	3.50175	5.80942	7.30983	7.85692	7.88233	8.25817	8.49275	11.8067	15.9524
Equity via full reallocation 1.7ºC (67%)	Scenario_1	Oil	EIA	1.10582	1.83455	2.30837	2.48113	2.48916	2.60784	2.68192	3.72842	5.03761
Equity via full reallocation 1.5ºC (50%)	Scenario_1	Oil	EIA	4.669	7.74589	9.74644	10.4759	10.5098	11.0109	11.3237	15.7422	21.2699
Cost-optimal 1.7ºC (83%)	Scenario_1	Oil	Upper	0.766552	1.17987	1.4486	1.54658	1.55113	1.61845	1.66046	2.254	2.99652
Cost-optimal 1.5ºC (50%)	Scenario_1	Oil	Upper	1.6839	2.59184	3.18216	3.39741	3.40741	3.55528	3.64757	4.95141	6.58252
Current trends 1.7ºC (67%)	Scenario_1	Oil	Upper	0.7084	1.09036	1.3387	1.42926	1.43346	1.49567	1.5345	2.08301	2.7692
Current trends 1.5ºC (50%)	Scenario_1	Oil	Upper	2.9348	4.5172	5.54606	5.9212	5.93863	6.19634	6.3572	8.6296	11.4724
Equity via partial reallocation 1.7ºC (67%)	Scenario_1	Oil	Upper	1.01701	1.56537	1.9219	2.0519	2.05794	2.14725	2.20299	2.99046	3.97558
Equity via partial reallocation 1.5ºC (50%)	Scenario_1	Oil	Upper	4.27992	6.58758	8.088	8.63508	8.6605	9.03633	9.27092	12.5848	16.7306
Equity via full reallocation 1.7ºC (67%)	Scenario_1	Oil	Upper	1.35155	2.08029	2.55411	2.72687	2.73489	2.85358	2.92766	3.97416	5.28334
Equity via full reallocation 1.5ºC (50%)	Scenario_1	Oil	Upper	5.70656	8.78344	10.784	11.5134	11.5473	12.0484	12.3612	16.7798	22.3074
Cost-optimal 1.7ºC (83%)	Scenario_1	Gas	Central	0.520909	0.739128	0.775264	0.793712	0.823195	0.829747	0.837678	1.17205	1.66128
Cost-optimal 1.5ºC (50%)	Scenario_1	Gas	Central	1.16203	1.64882	1.72944	1.77059	1.83636	1.85097	1.86867	2.61456	3.70593
Current trends 1.7ºC (67%)	Scenario_1	Gas	Central	0.479567	0.680467	0.713735	0.730719	0.757862	0.763894	0.771196	1.07903	1.52943
Current trends 1.5ºC (50%)	Scenario_1	Gas	Central	2.01418	2.85796	2.99769	3.06902	3.18302	3.20835	3.23902	4.53191	6.42361
Equity via partial reallocation 1.7ºC (67%)	Scenario_1	Gas	Central	0.686653	0.974305	1.02194	1.04626	1.08512	1.09376	1.10421	1.54497	2.18987
Equity via partial reallocation 1.5ºC (50%)	Scenario_1	Gas	Central	2.74661	3.89722	4.08776	4.18503	4.34048	4.37503	4.41685	6.17987	8.75946
Equity via full reallocation 1.7ºC (67%)	Scenario_1	Gas	Central	0.915537	1.29907	1.36259	1.39501	1.44683	1.45834	1.47228	2.05996	2.91982
Equity via full reallocation 1.5ºC (50%)	Scenario_1	Gas	Central	3.77659	5.35867	5.62066	5.75441	5.96816	6.01567	6.07317	8.49733	12.0443
Cost-optimal 1.7ºC (83%)	Scenario_1	Gas	EIA	0.520909	0.791922	0.838256	0.8636	0.908256	0.914807	0.925669	1.54161	2.43912
Cost-optimal 1.5ºC (50%)	Scenario_1	Gas	EIA	1.16203	1.7666	1.86995	1.92649	2.02611	2.04072	2.06495	3.43897	5.44112
Current trends 1.7ºC (67%)	Scenario_1	Gas	EIA	0.479567	0.729071	0.771727	0.795061	0.836172	0.842203	0.852203	1.41926	2.24554
Current trends 1.5ºC (50%)	Scenario_1	Gas	EIA	2.01418	3.0621	3.24125	3.33925	3.51192	3.53725	3.57925	5.96089	9.43127
Equity via partial reallocation 1.7ºC (67%)	Scenario_1	Gas	EIA	0.686653	1.0439	1.10497	1.13838	1.19725	1.20588	1.2202	2.03212	3.21521
Equity via partial reallocation 1.5ºC (50%)	Scenario_1	Gas	EIA	2.74661	4.17559	4.41989	4.55353	4.78898	4.82353	4.8808	8.12848	12.8608
Equity via full reallocation 1.7ºC (67%)	Scenario_1	Gas	EIA	0.915537	1.39186	1.4733	1.51784	1.59633	1.60784	1.62693	2.70949	4.28694
Equity via full reallocation 1.5ºC (50%)	Scenario_1	Gas	EIA	3.77659	5.74144	6.07735	6.2611	6.58485	6.63235	6.7111	11.1767	17.6836
Cost-optimal 1.7ºC (83%)	Scenario_1	Gas	Upper	0.679293	0.950307	0.99664	1.02198	1.06664	1.07319	1.08405	1.69999	2.59751
Cost-optimal 1.5ºC (50%)	Scenario_1	Gas	Upper	1.51535	2.11992	2.22327	2.27981	2.37943	2.39404	2.41827	3.79229	5.79444
Current trends 1.7ºC (67%)	Scenario_1	Gas	Upper	0.625381	0.874886	0.917542	0.940875	0.981986	0.988018	0.998018	1.56507	2.39135
Current trends 1.5ºC (50%)	Scenario_1	Gas	Upper	2.6266	3.67452	3.85367	3.95167	4.12434	4.14967	4.19167	6.57331	10.0437
Equity via partial reallocation 1.7ºC (67%)	Scenario_1	Gas	Upper	0.895432	1.25268	1.31375	1.34716	1.40603	1.41466	1.42898	2.2409	3.42398
Equity via partial reallocation 1.5ºC (50%)	Scenario_1	Gas	Upper	3.58173	5.01071	5.25501	5.38865	5.6241	5.65865	5.71592	8.9636	13.6959
Equity via full reallocation 1.7ºC (67%)	Scenario_1	Gas	Upper	1.19391	1.67024	1.75167	1.79622	1.8747	1.88622	1.90531	2.98787	4.56531
Equity via full reallocation 1.5ºC (50%)	Scenario_1	Gas	Upper	4.92488	6.88973	7.22564	7.40939	7.73314	7.78064	7.85939	12.325	18.8319
Cost-optimal 1.7ºC (83%)	Scenario_2	Oil	Central	0.627179	0.939567	1.1876			1.32603	1.35528	1.62201	1.99688	1.19043	1.25872
Cost-optimal 1.5ºC (50%)	Scenario_2	Oil	Central	1.37774	2.06397	2.60882			2.91292	2.97718	3.56311	4.38659	2.61505	2.76505
Current trends 1.7ºC (67%)	Scenario_2	Oil	Central	0.5796	0.86829	1.0975			1.22543	1.25247	1.49897	1.84539	1.10012	1.16323
Current trends 1.5ºC (50%)	Scenario_2	Oil	Central	2.4012	3.5972	4.5468			5.0768	5.1888	6.21	7.6452	4.55766	4.81909
Equity via partial reallocation 1.7ºC (67%)	Scenario_2	Oil	Central	0.832099	1.24655	1.57562			1.75929	1.7981	2.15198	2.64933	1.57939	1.66998
Equity via partial reallocation 1.5ºC (50%)	Scenario_2	Oil	Central	3.50175	5.24592	6.63075			7.40367	7.567	9.05625	11.1493	6.64658	7.02783
Equity via full reallocation 1.7ºC (67%)	Scenario_2	Oil	Central	1.10582	1.65661	2.09392			2.338	2.38958	2.85987	3.52082	2.09892	2.21932
Equity via full reallocation 1.5ºC (50%)	Scenario_2	Oil	Central	4.669	6.99456	8.841			9.87156	10.0893	12.075	14.8657	8.86211	9.37044
Cost-optimal 1.7ºC (83%)	Scenario_2	Oil	EIA	0.627179	1.04049	1.30922			1.47907	1.52109	2.11463	2.85715	1.31378	1.41176
Cost-optimal 1.5ºC (50%)	Scenario_2	Oil	EIA	1.37774	2.28567	2.876			3.24911	3.34141	4.64525	6.27636	2.886	3.10125
Current trends 1.7ºC (67%)	Scenario_2	Oil	EIA	0.5796	0.961559	1.2099			1.36687	1.4057	1.95421	2.6404	1.21411	1.30466
Current trends 1.5ºC (50%)	Scenario_2	Oil	EIA	2.4012	3.9836	5.01246			5.66274	5.8236	8.096	10.9388	5.02989	5.40503
Equity via partial reallocation 1.7ºC (67%)	Scenario_2	Oil	EIA	0.832099	1.38046	1.73699			1.96234	2.01808	2.80554	3.79067	1.74303	1.87303
Equity via partial reallocation 1.5ºC (50%)	Scenario_2	Oil	EIA	3.50175	5.80942	7.30983			8.25817	8.49275	11.8067	15.9524	7.33525	7.88233
Equity via full reallocation 1.7ºC (67%)	Scenario_2	Oil	EIA	1.10582	1.83455	2.30837			2.60784	2.68192	3.72842	5.03761	2.31639	2.48916
Equity via full reallocation 1.5ºC (50%)	Scenario_2	Oil	EIA	4.669	7.74589	9.74644			11.0109	11.3237	15.7422	21.2699	9.78033	10.5098
Cost-optimal 1.7ºC (83%)	Scenario_2	Oil	Upper	0.766552	1.17987	1.4486			1.61845	1.66046	2.254	2.99652	1.45315	1.55113
Cost-optimal 1.5ºC (50%)	Scenario_2	Oil	Upper	1.6839	2.59184	3.18216			3.55528	3.64757	4.95141	6.58252	3.19216	3.40741
Current trends 1.7ºC (67%)	Scenario_2	Oil	Upper	0.7084	1.09036	1.3387			1.49567	1.5345	2.08301	2.7692	1.34291	1.43346
Current trends 1.5ºC (50%)	Scenario_2	Oil	Upper	2.9348	4.5172	5.54606			6.19634	6.3572	8.6296	11.4724	5.56349	5.93863
Equity via partial reallocation 1.7ºC (67%)	Scenario_2	Oil	Upper	1.01701	1.56537	1.9219			2.14725	2.20299	2.99046	3.97558	1.92794	2.05794
Equity via partial reallocation 1.5ºC (50%)	Scenario_2	Oil	Upper	4.27992	6.58758	8.088			9.03633	9.27092	12.5848	16.7306	8.11342	8.6605
Equity via full reallocation 1.7ºC (67%)	Scenario_2	Oil	Upper	1.35155	2.08029	2.55411			2.85358	2.92766	3.97416	5.28334	2.56213	2.73489
Equity via full reallocation 1.5ºC (50%)	Scenario_2	Oil	Upper	5.70656	8.78344	10.784			12.0484	12.3612	16.7798	22.3074	10.8179	11.5473
Cost-optimal 1.7ºC (83%)	Scenario_2	Gas	Central	0.520909	0.739128	0.775264			0.829747	0.837678	1.17205	1.66128	0.804747	0.823195
Cost-optimal 1.5ºC (50%)	Scenario_2	Gas	Central	1.16203	1.64882	1.72944			1.85097	1.86867	2.61456	3.70593	1.7952	1.83636
Current trends 1.7ºC (67%)	Scenario_2	Gas	Central	0.479567	0.680467	0.713735			0.763894	0.771196	1.07903	1.52943	0.740878	0.757862
Current trends 1.5ºC (50%)	Scenario_2	Gas	Central	2.01418	2.85796	2.99769			3.20835	3.23902	4.53191	6.42361	3.11169	3.18302
Equity via partial reallocation 1.7ºC (67%)	Scenario_2	Gas	Central	0.686653	0.974305	1.02194			1.09376	1.10421	1.54497	2.18987	1.0608	1.08512
Equity via partial reallocation 1.5ºC (50%)	Scenario_2	Gas	Central	2.74661	3.89722	4.08776			4.37503	4.41685	6.17987	8.75946	4.24321	4.34048
Equity via full reallocation 1.7ºC (67%)	Scenario_2	Gas	Central	0.915537	1.29907	1.36259			1.45834	1.47228	2.05996	2.91982	1.4144	1.44683
Equity via full reallocation 1.5ºC (50%)	Scenario_2	Gas	Central	3.77659	5.35867	5.62066			6.01567	6.07317	8.49733	12.0443	5.83441	5.96816
Cost-optimal 1.7ºC (83%)	Scenario_2	Gas	EIA	0.520909	0.791922	0.838256			0.914807	0.925669	1.54161	2.43912	0.882911	0.908256
Cost-optimal 1.5ºC (50%)	Scenario_2	Gas	EIA	1.16203	1.7666	1.86995			2.04072	2.06495	3.43897	5.44112	1.96957	2.02611
Current trends 1.7ºC (67%)	Scenario_2	Gas	EIA	0.479567	0.729071	0.771727			0.842203	0.852203	1.41926	2.24554	0.812838	0.836172
Current trends 1.5ºC (50%)	Scenario_2	Gas	EIA	2.01418	3.0621	3.24125			3.53725	3.57925	5.96089	9.43127	3.41392	3.51192
Equity via partial reallocation 1.7ºC (67%)	Scenario_2	Gas	EIA	0.686653	1.0439	1.10497			1.20588	1.2202	2.03212	3.21521	1.16384	1.19725
Equity via partial reallocation 1.5ºC (50%)	Scenario_2	Gas	EIA	2.74661	4.17559	4.41989			4.82353	4.8808	8.12848	12.8608	4.65535	4.78898
Equity via full reallocation 1.7ºC (67%)	Scenario_2	Gas	EIA	0.915537	1.39186	1.4733			1.60784	1.62693	2.70949	4.28694	1.55178	1.59633
Equity via full reallocation 1.5ºC (50%)	Scenario_2	Gas	EIA	3.77659	5.74144	6.07735			6.63235	6.7111	11.1767	17.6836	6.4011	6.58485
Cost-optimal 1.7ºC (83%)	Scenario_2	Gas	Upper	0.679293	0.950307	0.99664			1.07319	1.08405	1.69999	2.59751	1.0413	1.06664
Cost-optimal 1.5ºC (50%)	Scenario_2	Gas	Upper	1.51535	2.11992	2.22327			2.39404	2.41827	3.79229	5.79444	2.32289	2.37943
Current trends 1.7ºC (67%)	Scenario_2	Gas	Upper	0.625381	0.874886	0.917542			0.988018	0.998018	1.56507	2.39135	0.958653	0.981986
Current trends 1.5ºC (50%)	Scenario_2	Gas	Upper	2.6266	3.67452	3.85367			4.14967	4.19167	6.57331	10.0437	4.02634	4.12434
Equity via partial reallocation 1.7ºC (67%)	Scenario_2	Gas	Upper	0.895432	1.25268	1.31375			1.41466	1.42898	2.2409	3.42398	1.37262	1.40603
Equity via partial reallocation 1.5ºC (50%)	Scenario_2	Gas	Upper	3.58173	5.01071	5.25501			5.65865	5.71592	8.9636	13.6959	5.49047	5.6241
Equity via full reallocation 1.7ºC (67%)	Scenario_2	Gas	Upper	1.19391	1.67024	1.75167			1.88622	1.90531	2.98787	4.56531	1.83016	1.8747
Equity via full reallocation 1.5ºC (50%)	Scenario_2	Gas	Upper	4.92488	6.88973	7.22564			7.78064	7.85939	12.325	18.8319	7.54939	7.73314
Cost-optimal 1.7ºC (83%)	Scenario_3	Oil	Central	0.627179	0.939567						1.62201	1.99688	1.01069		1.00785	1.078	1.10725	1.35528
Cost-optimal 1.5ºC (50%)	Scenario_3	Oil	Central	1.37774	2.06397						3.56311	4.38659	2.2202		2.21397	2.36807	2.43233	2.97718
Current trends 1.7ºC (67%)	Scenario_3	Oil	Central	0.5796	0.86829						1.49897	1.84539	0.934014		0.931393	0.996221	1.02326	1.25247
Current trends 1.5ºC (50%)	Scenario_3	Oil	Central	2.4012	3.5972						6.21	7.6452	3.86949		3.85863	4.1272	4.2392	5.1888
Equity via partial reallocation 1.7ºC (67%)	Scenario_3	Oil	Central	0.832099	1.24655						2.15198	2.64933	1.34091		1.33715	1.43022	1.46903	1.7981
Equity via partial reallocation 1.5ºC (50%)	Scenario_3	Oil	Central	3.50175	5.24592						9.05625	11.1493	5.643		5.62717	6.01883	6.18217	7.567
Equity via full reallocation 1.7ºC (67%)	Scenario_3	Oil	Central	1.10582	1.65661						2.85987	3.52082	1.782		1.777	1.90068	1.95226	2.38958
Equity via full reallocation 1.5ºC (50%)	Scenario_3	Oil	Central	4.669	6.99456						12.075	14.8657	7.524		7.50289	8.02511	8.24289	10.0893
Cost-optimal 1.7ºC (83%)	Scenario_3	Oil	EIA	0.627179	1.04049						2.11463	2.85715	1.14303		1.13848	1.21034	1.25236	1.52109
Cost-optimal 1.5ºC (50%)	Scenario_3	Oil	EIA	1.37774	2.28567						4.64525	6.27636	2.51092		2.50092	2.65879	2.75108	3.34141
Current trends 1.7ºC (67%)	Scenario_3	Oil	EIA	0.5796	0.961559						1.95421	2.6404	1.05632		1.05211	1.11852	1.15735	1.4057
Current trends 1.5ºC (50%)	Scenario_3	Oil	EIA	2.4012	3.9836						8.096	10.9388	4.37617		4.35874	4.63389	4.79474	5.8236
Equity via partial reallocation 1.7ºC (67%)	Scenario_3	Oil	EIA	0.832099	1.38046						2.80554	3.79067	1.5165		1.51046	1.6058	1.66154	2.01808
Equity via partial reallocation 1.5ºC (50%)	Scenario_3	Oil	EIA	3.50175	5.80942						11.8067	15.9524	6.38192		6.3565	6.75775	6.99233	8.49275
Equity via full reallocation 1.7ºC (67%)	Scenario_3	Oil	EIA	1.10582	1.83455						3.72842	5.03761	2.01534		2.00732	2.13403	2.20811	2.68192
Equity via full reallocation 1.5ºC (50%)	Scenario_3	Oil	EIA	4.669	7.74589						15.7422	21.2699	8.50922		8.47533	9.01033	9.32311	11.3237
Cost-optimal 1.7ºC (83%)	Scenario_3	Oil	Upper	0.766552	1.17987						2.254	2.99652	1.2824		1.27785	1.34972	1.39173	1.66046
Cost-optimal 1.5ºC (50%)	Scenario_3	Oil	Upper	1.6839	2.59184						4.95141	6.58252	2.81708		2.80708	2.96495	3.05725	3.64757
Current trends 1.7ºC (67%)	Scenario_3	Oil	Upper	0.7084	1.09036						2.08301	2.7692	1.18512		1.18091	1.24732	1.28615	1.5345
Current trends 1.5ºC (50%)	Scenario_3	Oil	Upper	2.9348	4.5172						8.6296	11.4724	4.90977		4.89234	5.16749	5.32834	6.3572
Equity via partial reallocation 1.7ºC (67%)	Scenario_3	Oil	Upper	1.01701	1.56537						2.99046	3.97558	1.70141		1.69537	1.79071	1.84646	2.20299
Equity via partial reallocation 1.5ºC (50%)	Scenario_3	Oil	Upper	4.27992	6.58758						12.5848	16.7306	7.16008		7.13467	7.53592	7.7705	9.27092
Equity via full reallocation 1.7ºC (67%)	Scenario_3	Oil	Upper	1.35155	2.08029						3.97416	5.28334	2.26108		2.25305	2.37976	2.45384	2.92766
Equity via full reallocation 1.5ºC (50%)	Scenario_3	Oil	Upper	5.70656	8.78344						16.7798	22.3074	9.54678		9.51289	10.0479	10.3607	12.3612
Cost-optimal 1.7ºC (83%)	Scenario_3	Gas	Central	0.520909	0.739128						1.17205	1.66128	0.787059		0.757576	0.79361	0.801541	0.837678
Cost-optimal 1.5ºC (50%)	Scenario_3	Gas	Central	1.16203	1.64882						2.61456	3.70593	1.75575		1.68998	1.77036	1.78805	1.86867
Current trends 1.7ºC (67%)	Scenario_3	Gas	Central	0.479567	0.680467						1.07903	1.52943	0.724594		0.697451	0.730625	0.737927	0.771196
Current trends 1.5ºC (50%)	Scenario_3	Gas	Central	2.01418	2.85796						4.53191	6.42361	3.04329		2.92929	3.06863	3.09929	3.23902
Equity via partial reallocation 1.7ºC (67%)	Scenario_3	Gas	Central	0.686653	0.974305						1.54497	2.18987	1.03749		0.998623	1.04612	1.05658	1.10421
Equity via partial reallocation 1.5ºC (50%)	Scenario_3	Gas	Central	2.74661	3.89722						6.17987	8.75946	4.14995		3.99449	4.18449	4.22631	4.41685
Equity via full reallocation 1.7ºC (67%)	Scenario_3	Gas	Central	0.915537	1.29907						2.05996	2.91982	1.38332		1.3315	1.39483	1.40877	1.47228
Equity via full reallocation 1.5ºC (50%)	Scenario_3	Gas	Central	3.77659	5.35867						8.49733	12.0443	5.70617		5.49242	5.75367	5.81118	6.07317
Cost-optimal 1.7ºC (83%)	Scenario_3	Gas	EIA	0.520909	0.791922						1.54161	2.43912	0.861922		0.817267	0.868474	0.879336	0.925669
Cost-optimal 1.5ºC (50%)	Scenario_3	Gas	EIA	1.16203	1.7666						3.43897	5.44112	1.92275		1.82313	1.93737	1.9616	2.06495
Current trends 1.7ºC (67%)	Scenario_3	Gas	EIA	0.479567	0.729071						1.41926	2.24554	0.793516		0.752405	0.799548	0.809548	0.852203
Current trends 1.5ºC (50%)	Scenario_3	Gas	EIA	2.01418	3.0621						5.96089	9.43127	3.33277		3.1601	3.3581	3.4001	3.57925
Equity via partial reallocation 1.7ºC (67%)	Scenario_3	Gas	EIA	0.686653	1.0439						2.03212	3.21521	1.13617		1.07731	1.14481	1.15912	1.2202
Equity via partial reallocation 1.5ºC (50%)	Scenario_3	Gas	EIA	2.74661	4.17559						8.12848	12.8608	4.54468		4.30923	4.57923	4.6365	4.8808
Equity via full reallocation 1.7ºC (67%)	Scenario_3	Gas	EIA	0.915537	1.39186						2.70949	4.28694	1.51489		1.43641	1.52641	1.5455	1.62693
Equity via full reallocation 1.5ºC (50%)	Scenario_3	Gas	EIA	3.77659	5.74144						11.1767	17.6836	6.24894		5.92519	6.29644	6.37519	6.7111
Cost-optimal 1.7ºC (83%)	Scenario_3	Gas	Upper	0.679293	0.950307						1.69999	2.59751	1.02031		0.975652	1.02686	1.03772	1.08405
Cost-optimal 1.5ºC (50%)	Scenario_3	Gas	Upper	1.51535	2.11992						3.79229	5.79444	2.27607		2.17645	2.29068	2.31492	2.41827
Current trends 1.7ºC (67%)	Scenario_3	Gas	Upper	0.625381	0.874886						1.56507	2.39135	0.93933		0.898219	0.945362	0.955362	0.998018
Current trends 1.5ºC (50%)	Scenario_3	Gas	Upper	2.6266	3.67452						6.57331	10.0437	3.94519		3.77252	3.97052	4.01252	4.19167
Equity via partial reallocation 1.7ºC (67%)	Scenario_3	Gas	Upper	0.895432	1.25268						2.2409	3.42398	1.34495		1.28609	1.35359	1.3679	1.42898
Equity via partial reallocation 1.5ºC (50%)	Scenario_3	Gas	Upper	3.58173	5.01071						8.9636	13.6959	5.3798		5.14435	5.41435	5.47162	5.71592
Equity via full reallocation 1.7ºC (67%)	Scenario_3	Gas	Upper	1.19391	1.67024						2.98787	4.56531	1.79327		1.71478	1.80478	1.82387	1.90531
Equity via full reallocation 1.5ºC (50%)	Scenario_3	Gas	Upper	4.92488	6.88973						12.325	18.8319	7.39723		7.07348	7.44473	7.52347	7.85939
Cost-optimal 1.7ºC (83%)	Scenario_4	Oil	Central	0.627179	0.939567		1.01069				1.62201	1.99688				1.078	1.10725	1.35528	0.942403
Cost-optimal 1.5ºC (50%)	Scenario_4	Oil	Central	1.37774	2.06397		2.2202				3.56311	4.38659				2.36807	2.43233	2.97718	2.0702
Current trends 1.7ºC (67%)	Scenario_4	Oil	Central	0.5796	0.86829		0.934014				1.49897	1.84539				0.996221	1.02326	1.25247	0.87091
Current trends 1.5ºC (50%)	Scenario_4	Oil	Central	2.4012	3.5972		3.86949				6.21	7.6452				4.1272	4.2392	5.1888	3.60806
Equity via partial reallocation 1.7ºC (67%)	Scenario_4	Oil	Central	0.832099	1.24655		1.34091				2.15198	2.64933				1.43022	1.46903	1.7981	1.25032
Equity via partial reallocation 1.5ºC (50%)	Scenario_4	Oil	Central	3.50175	5.24592		5.643				9.05625	11.1493				6.01883	6.18217	7.567	5.26175
Equity via full reallocation 1.7ºC (67%)	Scenario_4	Oil	Central	1.10582	1.65661		1.782				2.85987	3.52082				1.90068	1.95226	2.38958	1.66161
Equity via full reallocation 1.5ºC (50%)	Scenario_4	Oil	Central	4.669	6.99456		7.524				12.075	14.8657				8.02511	8.24289	10.0893	7.01567
Cost-optimal 1.7ºC (83%)	Scenario_4	Oil	EIA	0.627179	1.04049		1.14303				2.11463	2.85715				1.21034	1.25236	1.52109	1.04504
Cost-optimal 1.5ºC (50%)	Scenario_4	Oil	EIA	1.37774	2.28567		2.51092				4.64525	6.27636				2.65879	2.75108	3.34141	2.29567
Current trends 1.7ºC (67%)	Scenario_4	Oil	EIA	0.5796	0.961559		1.05632				1.95421	2.6404				1.11852	1.15735	1.4057	0.965766
Current trends 1.5ºC (50%)	Scenario_4	Oil	EIA	2.4012	3.9836		4.37617				8.096	10.9388				4.63389	4.79474	5.8236	4.00103
Equity via partial reallocation 1.7ºC (67%)	Scenario_4	Oil	EIA	0.832099	1.38046		1.5165				2.80554	3.79067				1.6058	1.66154	2.01808	1.3865
Equity via partial reallocation 1.5ºC (50%)	Scenario_4	Oil	EIA	3.50175	5.80942		6.38192				11.8067	15.9524				6.75775	6.99233	8.49275	5.83483
Equity via full reallocation 1.7ºC (67%)	Scenario_4	Oil	EIA	1.10582	1.83455		2.01534				3.72842	5.03761				2.13403	2.20811	2.68192	1.84258
Equity via full reallocation 1.5ºC (50%)	Scenario_4	Oil	EIA	4.669	7.74589		8.50922				15.7422	21.2699				9.01033	9.32311	11.3237	7.77978
Cost-optimal 1.7ºC (83%)	Scenario_4	Oil	Upper	0.766552	1.17987		1.2824				2.254	2.99652				1.34972	1.39173	1.66046	1.18442
Cost-optimal 1.5ºC (50%)	Scenario_4	Oil	Upper	1.6839	2.59184		2.81708				4.95141	6.58252				2.96495	3.05725	3.64757	2.60184
Current trends 1.7ºC (67%)	Scenario_4	Oil	Upper	0.7084	1.09036		1.18512				2.08301	2.7692				1.24732	1.28615	1.5345	1.09457
Current trends 1.5ºC (50%)	Scenario_4	Oil	Upper	2.9348	4.5172		4.90977				8.6296	11.4724				5.16749	5.32834	6.3572	4.53463
Equity via partial reallocation 1.7ºC (67%)	Scenario_4	Oil	Upper	1.01701	1.56537		1.70141				2.99046	3.97558				1.79071	1.84646	2.20299	1.57141
Equity via partial reallocation 1.5ºC (50%)	Scenario_4	Oil	Upper	4.27992	6.58758		7.16008				12.5848	16.7306				7.53592	7.7705	9.27092	6.613
Equity via full reallocation 1.7ºC (67%)	Scenario_4	Oil	Upper	1.35155	2.08029		2.26108				3.97416	5.28334				2.37976	2.45384	2.92766	2.08832
Equity via full reallocation 1.5ºC (50%)	Scenario_4	Oil	Upper	5.70656	8.78344		9.54678				16.7798	22.3074				10.0479	10.3607	12.3612	8.81733
Cost-optimal 1.7ºC (83%)	Scenario_4	Gas	Central	0.520909	0.739128		0.787059				1.17205	1.66128				0.79361	0.801541	0.837678	0.76861
Cost-optimal 1.5ºC (50%)	Scenario_4	Gas	Central	1.16203	1.64882		1.75575				2.61456	3.70593				1.77036	1.78805	1.86867	1.71459
Current trends 1.7ºC (67%)	Scenario_4	Gas	Central	0.479567	0.680467		0.724594				1.07903	1.52943				0.730625	0.737927	0.771196	0.70761
Current trends 1.5ºC (50%)	Scenario_4	Gas	Central	2.01418	2.85796		3.04329				4.53191	6.42361				3.06863	3.09929	3.23902	2.97196
Equity via partial reallocation 1.7ºC (67%)	Scenario_4	Gas	Central	0.686653	0.974305		1.03749				1.54497	2.18987				1.04612	1.05658	1.10421	1.01317
Equity via partial reallocation 1.5ºC (50%)	Scenario_4	Gas	Central	2.74661	3.89722		4.14995				6.17987	8.75946				4.18449	4.22631	4.41685	4.05267
Equity via full reallocation 1.7ºC (67%)	Scenario_4	Gas	Central	0.915537	1.29907		1.38332				2.05996	2.91982				1.39483	1.40877	1.47228	1.35089
Equity via full reallocation 1.5ºC (50%)	Scenario_4	Gas	Central	3.77659	5.35867		5.70617				8.49733	12.0443				5.75367	5.81118	6.07317	5.57242
Cost-optimal 1.7ºC (83%)	Scenario_4	Gas	EIA	0.520909	0.791922		0.861922				1.54161	2.43912				0.868474	0.879336	0.925669	0.836578
Cost-optimal 1.5ºC (50%)	Scenario_4	Gas	EIA	1.16203	1.7666		1.92275				3.43897	5.44112				1.93737	1.9616	2.06495	1.86621
Current trends 1.7ºC (67%)	Scenario_4	Gas	EIA	0.479567	0.729071		0.793516				1.41926	2.24554				0.799548	0.809548	0.852203	0.770183
Current trends 1.5ºC (50%)	Scenario_4	Gas	EIA	2.01418	3.0621		3.33277				5.96089	9.43127				3.3581	3.4001	3.57925	3.23477
Equity via partial reallocation 1.7ºC (67%)	Scenario_4	Gas	EIA	0.686653	1.0439		1.13617				2.03212	3.21521				1.14481	1.15912	1.2202	1.10276
Equity via partial reallocation 1.5ºC (50%)	Scenario_4	Gas	EIA	2.74661	4.17559		4.54468				8.12848	12.8608				4.57923	4.6365	4.8808	4.41105
Equity via full reallocation 1.7ºC (67%)	Scenario_4	Gas	EIA	0.915537	1.39186		1.51489				2.70949	4.28694				1.52641	1.5455	1.62693	1.47035
Equity via full reallocation 1.5ºC (50%)	Scenario_4	Gas	EIA	3.77659	5.74144		6.24894				11.1767	17.6836				6.29644	6.37519	6.7111	6.06519
Cost-optimal 1.7ºC (83%)	Scenario_4	Gas	Upper	0.679293	0.950307		1.02031				1.69999	2.59751				1.02686	1.03772	1.08405	0.994962
Cost-optimal 1.5ºC (50%)	Scenario_4	Gas	Upper	1.51535	2.11992		2.27607				3.79229	5.79444				2.29068	2.31492	2.41827	2.21953
Current trends 1.7ºC (67%)	Scenario_4	Gas	Upper	0.625381	0.874886		0.93933				1.56507	2.39135				0.945362	0.955362	0.998018	0.915997
Current trends 1.5ºC (50%)	Scenario_4	Gas	Upper	2.6266	3.67452		3.94519				6.57331	10.0437				3.97052	4.01252	4.19167	3.84719
Equity via partial reallocation 1.7ºC (67%)	Scenario_4	Gas	Upper	0.895432	1.25268		1.34495				2.2409	3.42398				1.35359	1.3679	1.42898	1.31154
Equity via partial reallocation 1.5ºC (50%)	Scenario_4	Gas	Upper	3.58173	5.01071		5.3798				8.9636	13.6959				5.41435	5.47162	5.71592	5.24616
Equity via full reallocation 1.7ºC (67%)	Scenario_4	Gas	Upper	1.19391	1.67024		1.79327				2.98787	4.56531				1.80478	1.82387	1.90531	1.74872
Equity via full reallocation 1.5ºC (50%)	Scenario_4	Gas	Upper	4.92488	6.88973		7.39723				12.325	18.8319				7.44473	7.52347	7.85939	7.21347
Cost-optimal 1.7ºC (83%)	Scenario_5	Oil	Central	0.55606					1.32603	1.35528	1.62201	1.99688							0.627179	0.624343	0.939567	1.25872
Cost-optimal 1.5ºC (50%)	Scenario_5	Oil	Central	1.22151					2.91292	2.97718	3.56311	4.38659							1.37774	1.37151	2.06397	2.76505
Current trends 1.7ºC (67%)	Scenario_5	Oil	Central	0.513876					1.22543	1.25247	1.49897	1.84539							0.5796	0.576979	0.86829	1.16323
Current trends 1.5ºC (50%)	Scenario_5	Oil	Central	2.12891					5.0768	5.1888	6.21	7.6452							2.4012	2.39034	3.5972	4.81909
Equity via partial reallocation 1.7ºC (67%)	Scenario_5	Oil	Central	0.737743					1.75929	1.7981	2.15198	2.64933							0.832099	0.828337	1.24655	1.66998
Equity via partial reallocation 1.5ºC (50%)	Scenario_5	Oil	Central	3.10467					7.40367	7.567	9.05625	11.1493							3.50175	3.48592	5.24592	7.02783
Equity via full reallocation 1.7ºC (67%)	Scenario_5	Oil	Central	0.980421					2.338	2.38958	2.85987	3.52082							1.10582	1.10082	1.65661	2.21932
Equity via full reallocation 1.5ºC (50%)	Scenario_5	Oil	Central	4.13956					9.87156	10.0893	12.075	14.8657							4.669	4.64789	6.99456	9.37044
Cost-optimal 1.7ºC (83%)	Scenario_5	Oil	EIA	0.55606					1.51049	1.55251	2.14604	2.88857							0.658597	0.654045	1.07191	1.44318
Cost-optimal 1.5ºC (50%)	Scenario_5	Oil	EIA	1.22151					3.31813	3.41043	4.71426	6.34538							1.44675	1.43675	2.35469	3.17026
Current trends 1.7ºC (67%)	Scenario_5	Oil	EIA	0.513876					1.3959	1.43473	1.98324	2.66943							0.608634	0.604428	0.990593	1.3337
Current trends 1.5ºC (50%)	Scenario_5	Oil	EIA	2.12891					5.78303	5.94389	8.21629	11.0591							2.52149	2.50406	4.10389	5.52531
Equity via partial reallocation 1.7ºC (67%)	Scenario_5	Oil	EIA	0.737743					2.00402	2.05976	2.84723	3.83236							0.873782	0.867743	1.42214	1.91471
Equity via partial reallocation 1.5ºC (50%)	Scenario_5	Oil	EIA	3.10467					8.43358	8.66817	11.9821	16.1278							3.67717	3.65175	5.98483	8.05775
Equity via full reallocation 1.7ºC (67%)	Scenario_5	Oil	EIA	0.980421					2.66324	2.73732	3.78382	5.093							1.16121	1.15318	1.88995	2.54455
Equity via full reallocation 1.5ºC (50%)	Scenario_5	Oil	EIA	4.13956					11.2448	11.5576	15.9761	21.5038							4.90289	4.869	7.97978	10.7437
Cost-optimal 1.7ºC (83%)	Scenario_5	Oil	Upper	0.664015					1.61845	1.66046	2.254	2.99652							0.766552	0.762	1.17987	1.55113
Cost-optimal 1.5ºC (50%)	Scenario_5	Oil	Upper	1.45866					3.55528	3.64757	4.95141	6.58252							1.6839	1.6739	2.59184	3.40741
Current trends 1.7ºC (67%)	Scenario_5	Oil	Upper	0.613641					1.49567	1.5345	2.08301	2.7692							0.7084	0.704193	1.09036	1.43346
Current trends 1.5ºC (50%)	Scenario_5	Oil	Upper	2.54223					6.19634	6.3572	8.6296	11.4724							2.9348	2.91737	4.5172	5.93863
Equity via partial reallocation 1.7ºC (67%)	Scenario_5	Oil	Upper	0.88097					2.14725	2.20299	2.99046	3.97558							1.01701	1.01097	1.56537	2.05794
Equity via partial reallocation 1.5ºC (50%)	Scenario_5	Oil	Upper	3.70742					9.03633	9.27092	12.5848	16.7306							4.27992	4.2545	6.58758	8.6605
Equity via full reallocation 1.7ºC (67%)	Scenario_5	Oil	Upper	1.17076					2.85358	2.92766	3.97416	5.28334							1.35155	1.34353	2.08029	2.73489
Equity via full reallocation 1.5ºC (50%)	Scenario_5	Oil	Upper	4.94322					12.0484	12.3612	16.7798	22.3074							5.70656	5.67267	8.78344	11.5473
Cost-optimal 1.7ºC (83%)	Scenario_5	Gas	Central	0.472978					0.829747	0.837678	1.17205	1.66128							0.520909	0.491426	0.739128	0.823195
Cost-optimal 1.5ºC (50%)	Scenario_5	Gas	Central	1.0551					1.85097	1.86867	2.61456	3.70593							1.16203	1.09626	1.64882	1.83636
Current trends 1.7ºC (67%)	Scenario_5	Gas	Central	0.43544					0.763894	0.771196	1.07903	1.52943							0.479567	0.452424	0.680467	0.757862
Current trends 1.5ºC (50%)	Scenario_5	Gas	Central	1.82885					3.20835	3.23902	4.53191	6.42361							2.01418	1.90018	2.85796	3.18302
Equity via partial reallocation 1.7ºC (67%)	Scenario_5	Gas	Central	0.623471					1.09376	1.10421	1.54497	2.18987							0.686653	0.647789	0.974305	1.08512
Equity via partial reallocation 1.5ºC (50%)	Scenario_5	Gas	Central	2.49388					4.37503	4.41685	6.17987	8.75946							2.74661	2.59116	3.89722	4.34048
Equity via full reallocation 1.7ºC (67%)	Scenario_5	Gas	Central	0.831295					1.45834	1.47228	2.05996	2.91982							0.915537	0.863719	1.29907	1.44683
Equity via full reallocation 1.5ºC (50%)	Scenario_5	Gas	Central	3.42909					6.01567	6.07317	8.49733	12.0443							3.77659	3.56284	5.35867	5.96816
Cost-optimal 1.7ºC (83%)	Scenario_5	Gas	EIA	0.472978					0.936876	0.947738	1.56368	2.46119							0.542978	0.498323	0.813991	0.930324
Cost-optimal 1.5ºC (50%)	Scenario_5	Gas	EIA	1.0551					2.08995	2.11419	3.4882	5.49035							1.21126	1.11164	1.81583	2.07534
Current trends 1.7ºC (67%)	Scenario_5	Gas	EIA	0.43544					0.862521	0.872521	1.43958	2.26586							0.499884	0.458773	0.749389	0.856489
Current trends 1.5ºC (50%)	Scenario_5	Gas	EIA	1.82885					3.62259	3.66459	6.04622	9.5166							2.09951	1.92685	3.14743	3.59725
Equity via partial reallocation 1.7ºC (67%)	Scenario_5	Gas	EIA	0.623471					1.23497	1.24929	2.06121	3.2443							0.715744	0.65688	1.07299	1.22634
Equity via partial reallocation 1.5ºC (50%)	Scenario_5	Gas	EIA	2.49388					4.93989	4.99717	8.24485	12.9772							2.86297	2.62752	4.29195	4.90535
Equity via full reallocation 1.7ºC (67%)	Scenario_5	Gas	EIA	0.831295					1.64663	1.66572	2.74828	4.32573							0.954325	0.87584	1.43065	1.63512
Equity via full reallocation 1.5ºC (50%)	Scenario_5	Gas	EIA	3.42909					6.79235	6.8711	11.3367	17.8436							3.93659	3.61284	5.90144	6.74485
Cost-optimal 1.7ºC (83%)	Scenario_5	Gas	Upper	0.609293					1.07319	1.08405	1.69999	2.59751							0.679293	0.634638	0.950307	1.06664
Cost-optimal 1.5ºC (50%)	Scenario_5	Gas	Upper	1.35919					2.39404	2.41827	3.79229	5.79444							1.51535	1.41573	2.11992	2.37943
Current trends 1.7ºC (67%)	Scenario_5	Gas	Upper	0.560937					0.988018	0.998018	1.56507	2.39135							0.625381	0.58427	0.874886	0.981986
Current trends 1.5ºC (50%)	Scenario_5	Gas	Upper	2.35593					4.14967	4.19167	6.57331	10.0437							2.6266	2.45393	3.67452	4.12434
Equity via partial reallocation 1.7ºC (67%)	Scenario_5	Gas	Upper	0.80316					1.41466	1.42898	2.2409	3.42398							0.895432	0.836569	1.25268	1.40603
Equity via partial reallocation 1.5ºC (50%)	Scenario_5	Gas	Upper	3.21264					5.65865	5.71592	8.9636	13.6959							3.58173	3.34627	5.01071	5.6241
Equity via full reallocation 1.7ºC (67%)	Scenario_5	Gas	Upper	1.07088					1.88622	1.90531	2.98787	4.56531							1.19391	1.11542	1.67024	1.8747
Equity via full reallocation 1.5ºC (50%)	Scenario_5	Gas	Upper	4.41738					7.78064	7.85939	12.325	18.8319							4.92488	4.60113	6.88972	7.73314
Cost-optimal 1.7ºC (83%)	Scenario_6	Oil	Central	0.55606					1.32603	1.35528	1.62201	1.99688			0.627179						0.939567	1.25872	0.558896
Cost-optimal 1.5ºC (50%)	Scenario_6	Oil	Central	1.22151					2.91292	2.97718	3.56311	4.38659			1.37774						2.06397	2.76505	1.22774
Current trends 1.7ºC (67%)	Scenario_6	Oil	Central	0.513876					1.22543	1.25247	1.49897	1.84539			0.5796						0.86829	1.16323	0.516497
Current trends 1.5ºC (50%)	Scenario_6	Oil	Central	2.12891					5.0768	5.1888	6.21	7.6452			2.4012						3.5972	4.81909	2.13977
Equity via partial reallocation 1.7ºC (67%)	Scenario_6	Oil	Central	0.737743					1.75929	1.7981	2.15198	2.64933			0.832099						1.24655	1.66998	0.741505
Equity via partial reallocation 1.5ºC (50%)	Scenario_6	Oil	Central	3.10467					7.40367	7.567	9.05625	11.1493			3.50175						5.24592	7.02783	3.1205
Equity via full reallocation 1.7ºC (67%)	Scenario_6	Oil	Central	0.980421					2.338	2.38958	2.85987	3.52082			1.10582						1.65661	2.21932	0.985421
Equity via full reallocation 1.5ºC (50%)	Scenario_6	Oil	Central	4.13956					9.87156	10.0893	12.075	14.8657			4.669						6.99456	9.37044	4.16067
Cost-optimal 1.7ºC (83%)	Scenario_6	Oil	EIA	0.55606					1.51049	1.55251	2.14604	2.88857			0.658597						1.07191	1.44318	0.560612
Cost-optimal 1.5ºC (50%)	Scenario_6	Oil	EIA	1.22151					3.31813	3.41043	4.71426	6.34538			1.44675						2.35469	3.17026	1.23151
Current trends 1.7ºC (67%)	Scenario_6	Oil	EIA	0.513876					1.3959	1.43473	1.98324	2.66943			0.608634						0.990593	1.3337	0.518083
Current trends 1.5ºC (50%)	Scenario_6	Oil	EIA	2.12891					5.78303	5.94389	8.21629	11.0591			2.52149						4.10389	5.52531	2.14634
Equity via partial reallocation 1.7ºC (67%)	Scenario_6	Oil	EIA	0.737743					2.00402	2.05976	2.84723	3.83236			0.873782						1.42214	1.91471	0.743782
Equity via partial reallocation 1.5ºC (50%)	Scenario_6	Oil	EIA	3.10467					8.43358	8.66817	11.9821	16.1278			3.67717						5.98483	8.05775	3.13008
Equity via full reallocation 1.7ºC (67%)	Scenario_6	Oil	EIA	0.980421					2.66324	2.73732	3.78382	5.093			1.16121						1.88995	2.54455	0.988447
Equity via full reallocation 1.5ºC (50%)	Scenario_6	Oil	EIA	4.13956					11.2448	11.5576	15.9761	21.5038			4.90289						7.97978	10.7437	4.17344
Cost-optimal 1.7ºC (83%)	Scenario_6	Oil	Upper	0.664015					1.61845	1.66046	2.254	2.99652			0.766552						1.17987	1.55113	0.668567
Cost-optimal 1.5ºC (50%)	Scenario_6	Oil	Upper	1.45866					3.55528	3.64757	4.95141	6.58252			1.6839						2.59184	3.40741	1.46866
Current trends 1.7ºC (67%)	Scenario_6	Oil	Upper	0.613641					1.49567	1.5345	2.08301	2.7692			0.7084						1.09036	1.43346	0.617848
Current trends 1.5ºC (50%)	Scenario_6	Oil	Upper	2.54223					6.19634	6.3572	8.6296	11.4724			2.9348						4.5172	5.93863	2.55966
Equity via partial reallocation 1.7ºC (67%)	Scenario_6	Oil	Upper	0.88097					2.14725	2.20299	2.99046	3.97558			1.01701						1.56537	2.05794	0.88701
Equity via partial reallocation 1.5ºC (50%)	Scenario_6	Oil	Upper	3.70742					9.03633	9.27092	12.5848	16.7306			4.27992						6.58758	8.6605	3.73283
Equity via full reallocation 1.7ºC (67%)	Scenario_6	Oil	Upper	1.17076					2.85358	2.92766	3.97416	5.28334			1.35155						2.08029	2.73489	1.17879
Equity via full reallocation 1.5ºC (50%)	Scenario_6	Oil	Upper	4.94322					12.0484	12.3612	16.7798	22.3074			5.70656						8.78344	11.5473	4.97711
Cost-optimal 1.7ºC (83%)	Scenario_6	Gas	Central	0.472978					0.829747	0.837678	1.17205	1.66128			0.520909						0.739128	0.823195	0.502461
Cost-optimal 1.5ºC (50%)	Scenario_6	Gas	Central	1.0551					1.85097	1.86867	2.61456	3.70593			1.16203						1.64882	1.83636	1.12087
Current trends 1.7ºC (67%)	Scenario_6	Gas	Central	0.43544					0.763894	0.771196	1.07903	1.52943			0.479567						0.680467	0.757862	0.462583
Current trends 1.5ºC (50%)	Scenario_6	Gas	Central	1.82885					3.20835	3.23902	4.53191	6.42361			2.01418						2.85796	3.18302	1.94285
Equity via partial reallocation 1.7ºC (67%)	Scenario_6	Gas	Central	0.623471					1.09376	1.10421	1.54497	2.18987			0.686653						0.974305	1.08512	0.662335
Equity via partial reallocation 1.5ºC (50%)	Scenario_6	Gas	Central	2.49388					4.37503	4.41685	6.17987	8.75946			2.74661						3.89722	4.34048	2.64934
Equity via full reallocation 1.7ºC (67%)	Scenario_6	Gas	Central	0.831295					1.45834	1.47228	2.05996	2.91982			0.915537						1.29907	1.44683	0.883113
Equity via full reallocation 1.5ºC (50%)	Scenario_6	Gas	Central	3.42909					6.01567	6.07317	8.49733	12.0443			3.77659						5.35867	5.96816	3.64284
Cost-optimal 1.7ºC (83%)	Scenario_6	Gas	EIA	0.472978					0.936876	0.947738	1.56368	2.46119			0.542978						0.813991	0.930324	0.517633
Cost-optimal 1.5ºC (50%)	Scenario_6	Gas	EIA	1.0551					2.08995	2.11419	3.4882	5.49035			1.21126						1.81583	2.07534	1.15472
Current trends 1.7ºC (67%)	Scenario_6	Gas	EIA	0.43544					0.862521	0.872521	1.43958	2.26586			0.499884						0.749389	0.856489	0.476551
Current trends 1.5ºC (50%)	Scenario_6	Gas	EIA	1.82885					3.62259	3.66459	6.04622	9.5166			2.09951						3.14743	3.59725	2.00151
Equity via partial reallocation 1.7ºC (67%)	Scenario_6	Gas	EIA	0.623471					1.23497	1.24929	2.06121	3.2443			0.715744						1.07299	1.22634	0.682335
Equity via partial reallocation 1.5ºC (50%)	Scenario_6	Gas	EIA	2.49388					4.93989	4.99717	8.24485	12.9772			2.86297						4.29195	4.90535	2.72934
Equity via full reallocation 1.7ºC (67%)	Scenario_6	Gas	EIA	0.831295					1.64663	1.66572	2.74828	4.32573			0.954325						1.43065	1.63512	0.909779
Equity via full reallocation 1.5ºC (50%)	Scenario_6	Gas	EIA	3.42909					6.79235	6.8711	11.3367	17.8436			3.93659						5.90144	6.74485	3.75284
Cost-optimal 1.7ºC (83%)	Scenario_6	Gas	Upper	0.609293					1.07319	1.08405	1.69999	2.59751			0.679293						0.950307	1.06664	0.653949
Cost-optimal 1.5ºC (50%)	Scenario_6	Gas	Upper	1.35919					2.39404	2.41827	3.79229	5.79444			1.51535						2.11992	2.37943	1.45881
Current trends 1.7ºC (67%)	Scenario_6	Gas	Upper	0.560937					0.988018	0.998018	1.56507	2.39135			0.625381						0.874886	0.981986	0.602048
Current trends 1.5ºC (50%)	Scenario_6	Gas	Upper	2.35593					4.14967	4.19167	6.57331	10.0437			2.6266						3.67452	4.12434	2.5286
Equity via partial reallocation 1.7ºC (67%)	Scenario_6	Gas	Upper	0.80316					1.41466	1.42898	2.2409	3.42398			0.895432						1.25268	1.40603	0.862023
Equity via partial reallocation 1.5ºC (50%)	Scenario_6	Gas	Upper	3.21264					5.65865	5.71592	8.9636	13.6959			3.58173						5.01071	5.6241	3.44809
Equity via full reallocation 1.7ºC (67%)	Scenario_6	Gas	Upper	1.07088					1.88622	1.90531	2.98787	4.56531			1.19391						1.67024	1.8747	1.14936
Equity via full reallocation 1.5ºC (50%)	Scenario_6	Gas	Upper	4.41738					7.78064	7.85939	12.325	18.8319			4.92488						6.88972	7.73314	4.74113
Cost-optimal 1.7ºC (83%)	Scenario_7	Oil	Central	0.55606							1.62201	1.99688				1.00688	1.03613	1.35528	0.627179	0.624343	0.939567
Cost-optimal 1.5ºC (50%)	Scenario_7	Oil	Central	1.22151							3.56311	4.38659				2.21184	2.2761	2.97718	1.37774	1.37151	2.06397
Current trends 1.7ºC (67%)	Scenario_7	Oil	Central	0.513876							1.49897	1.84539				0.930497	0.957531	1.25247	0.5796	0.576979	0.86829
Current trends 1.5ºC (50%)	Scenario_7	Oil	Central	2.12891							6.21	7.6452				3.85491	3.96691	5.1888	2.4012	2.39034	3.5972
Equity via partial reallocation 1.7ºC (67%)	Scenario_7	Oil	Central	0.737743							2.15198	2.64933				1.33586	1.37467	1.7981	0.832099	0.828337	1.24655
Equity via partial reallocation 1.5ºC (50%)	Scenario_7	Oil	Central	3.10467							9.05625	11.1493				5.62175	5.78508	7.567	3.50175	3.48592	5.24592
Equity via full reallocation 1.7ºC (67%)	Scenario_7	Oil	Central	0.980421							2.85987	3.52082				1.77529	1.82687	2.38958	1.10582	1.10082	1.65661
Equity via full reallocation 1.5ºC (50%)	Scenario_7	Oil	Central	4.13956							12.075	14.8657				7.49567	7.71344	10.0893	4.669	4.64789	6.99456
Cost-optimal 1.7ºC (83%)	Scenario_7	Oil	EIA	0.55606							2.14604	2.88857				1.13922	1.18124	1.55251	0.658597	0.654045	1.07191
Cost-optimal 1.5ºC (50%)	Scenario_7	Oil	EIA	1.22151							4.71426	6.34538				2.50256	2.59485	3.41043	1.44675	1.43675	2.35469
Current trends 1.7ºC (67%)	Scenario_7	Oil	EIA	0.513876							1.98324	2.66943				1.0528	1.09163	1.43473	0.608634	0.604428	0.990593
Current trends 1.5ºC (50%)	Scenario_7	Oil	EIA	2.12891							8.21629	11.0591				4.3616	4.52246	5.94389	2.52149	2.50406	4.10389
Equity via partial reallocation 1.7ºC (67%)	Scenario_7	Oil	EIA	0.737743							2.84723	3.83236				1.51145	1.56719	2.05976	0.873782	0.867743	1.42214
Equity via partial reallocation 1.5ºC (50%)	Scenario_7	Oil	EIA	3.10467							11.9821	16.1278				6.36067	6.59525	8.66817	3.67717	3.65175	5.98483
Equity via full reallocation 1.7ºC (67%)	Scenario_7	Oil	EIA	0.980421							3.78382	5.093				2.00863	2.08271	2.73732	1.16121	1.15318	1.88995
Equity via full reallocation 1.5ºC (50%)	Scenario_7	Oil	EIA	4.13956							15.9761	21.5038				8.48089	8.79367	11.5576	4.90289	4.869	7.97978
Cost-optimal 1.7ºC (83%)	Scenario_7	Oil	Upper	0.664015							2.254	2.99652				1.24718	1.28919	1.66046	0.766552	0.762	1.17987
Cost-optimal 1.5ºC (50%)	Scenario_7	Oil	Upper	1.45866							4.95141	6.58252				2.7397	2.832	3.64757	1.6839	1.6739	2.59184
Current trends 1.7ºC (67%)	Scenario_7	Oil	Upper	0.613641							2.08301	2.7692				1.15257	1.19139	1.5345	0.7084	0.704193	1.09036
Current trends 1.5ºC (50%)	Scenario_7	Oil	Upper	2.54223							8.6296	11.4724				4.77491	4.93577	6.3572	2.9348	2.91737	4.5172
Equity via partial reallocation 1.7ºC (67%)	Scenario_7	Oil	Upper	0.88097							2.99046	3.97558				1.65467	1.71042	2.20299	1.01701	1.01097	1.56537
Equity via partial reallocation 1.5ºC (50%)	Scenario_7	Oil	Upper	3.70742							12.5848	16.7306				6.96342	7.198	9.27092	4.27992	4.2545	6.58758
Equity via full reallocation 1.7ºC (67%)	Scenario_7	Oil	Upper	1.17076							3.97416	5.28334				2.19897	2.27305	2.92766	1.35155	1.34353	2.08029
Equity via full reallocation 1.5ºC (50%)	Scenario_7	Oil	Upper	4.94322							16.7798	22.3074				9.28456	9.59733	12.3612	5.70656	5.67267	8.78344
Cost-optimal 1.7ºC (83%)	Scenario_7	Gas	Central	0.472978							1.17205	1.66128				0.745679	0.75361	0.837678	0.520909	0.491426	0.739128
Cost-optimal 1.5ºC (50%)	Scenario_7	Gas	Central	1.0551							2.61456	3.70593				1.66344	1.68113	1.86867	1.16203	1.09626	1.64882
Current trends 1.7ºC (67%)	Scenario_7	Gas	Central	0.43544							1.07903	1.52943				0.686498	0.6938	0.771196	0.479567	0.452424	0.680467
Current trends 1.5ºC (50%)	Scenario_7	Gas	Central	1.82885							4.53191	6.42361				2.88329	2.91396	3.23902	2.01418	1.90018	2.85796
Equity via partial reallocation 1.7ºC (67%)	Scenario_7	Gas	Central	0.623471							1.54497	2.18987				0.982941	0.993395	1.10421	0.686653	0.647789	0.974305
Equity via partial reallocation 1.5ºC (50%)	Scenario_7	Gas	Central	2.49388							6.17987	8.75946				3.93176	3.97358	4.41685	2.74661	2.59116	3.89722
Equity via full reallocation 1.7ºC (67%)	Scenario_7	Gas	Central	0.831295							2.05996	2.91982				1.31059	1.32453	1.47228	0.915537	0.863719	1.29907
Equity via full reallocation 1.5ºC (50%)	Scenario_7	Gas	Central	3.42909							8.49733	12.0443				5.40617	5.46368	6.07317	3.77659	3.56284	5.35867
Cost-optimal 1.7ºC (83%)	Scenario_7	Gas	EIA	0.472978							1.56368	2.46119				0.820543	0.831405	0.947738	0.542978	0.498323	0.813991
Cost-optimal 1.5ºC (50%)	Scenario_7	Gas	EIA	1.0551							3.4882	5.49035				1.83044	1.85467	2.11419	1.21126	1.11164	1.81583
Current trends 1.7ºC (67%)	Scenario_7	Gas	EIA	0.43544							1.43958	2.26586				0.755421	0.765421	0.872521	0.499884	0.458773	0.749389
Current trends 1.5ºC (50%)	Scenario_7	Gas	EIA	1.82885							6.04622	9.5166				3.17277	3.21477	3.66459	2.09951	1.92685	3.14743
Equity via partial reallocation 1.7ºC (67%)	Scenario_7	Gas	EIA	0.623471							2.06121	3.2443				1.08163	1.09594	1.24929	0.715744	0.65688	1.07299
Equity via partial reallocation 1.5ºC (50%)	Scenario_7	Gas	EIA	2.49388							8.24485	12.9772				4.3265	4.38377	4.99717	2.86297	2.62752	4.29195
Equity via full reallocation 1.7ºC (67%)	Scenario_7	Gas	EIA	0.831295							2.74828	4.32573				1.44217	1.46126	1.66572	0.954325	0.87584	1.43065
Equity via full reallocation 1.5ºC (50%)	Scenario_7	Gas	EIA	3.42909							11.3367	17.8436				5.94894	6.02769	6.8711	3.93659	3.61284	5.90144
Cost-optimal 1.7ºC (83%)	Scenario_7	Gas	Upper	0.609293							1.69999	2.59751				0.956859	0.967721	1.08405	0.679293	0.634638	0.950307
Cost-optimal 1.5ºC (50%)	Scenario_7	Gas	Upper	1.35919							3.79229	5.79444				2.13453	2.15876	2.41827	1.51535	1.41573	2.11992
Current trends 1.7ºC (67%)	Scenario_7	Gas	Upper	0.560937							1.56507	2.39135				0.880917	0.890917	0.998018	0.625381	0.58427	0.874886
Current trends 1.5ºC (50%)	Scenario_7	Gas	Upper	2.35593							6.57331	10.0437				3.69985	3.74185	4.19167	2.6266	2.45393	3.67452
Equity via partial reallocation 1.7ºC (67%)	Scenario_7	Gas	Upper	0.80316							2.2409	3.42398				1.26131	1.27563	1.42898	0.895432	0.836569	1.25268
Equity via partial reallocation 1.5ºC (50%)	Scenario_7	Gas	Upper	3.21264							8.9636	13.6959				5.04525	5.10253	5.71592	3.58173	3.34627	5.01071
Equity via full reallocation 1.7ºC (67%)	Scenario_7	Gas	Upper	1.07088							2.98787	4.56531				1.68175	1.70084	1.90531	1.19391	1.11542	1.67024
Equity via full reallocation 1.5ºC (50%)	Scenario_7	Gas	Upper	4.41738							12.325	18.8319				6.93722	7.01597	7.85939	4.92488	4.60113	6.88972
Cost-optimal 1.7ºC (83%)	Scenario_8	Oil	Central	0.55606							1.62201	1.99688			0.627179	1.00688	1.03613	1.35528			0.939567		0.558896
Cost-optimal 1.5ºC (50%)	Scenario_8	Oil	Central	1.22151							3.56311	4.38659			1.37774	2.21184	2.2761	2.97718			2.06397		1.22774
Current trends 1.7ºC (67%)	Scenario_8	Oil	Central	0.513876							1.49897	1.84539			0.5796	0.930497	0.957531	1.25247			0.86829		0.516497
Current trends 1.5ºC (50%)	Scenario_8	Oil	Central	2.12891							6.21	7.6452			2.4012	3.85491	3.96691	5.1888			3.5972		2.13977
Equity via partial reallocation 1.7ºC (67%)	Scenario_8	Oil	Central	0.737743							2.15198	2.64933			0.832099	1.33586	1.37467	1.7981			1.24655		0.741505
Equity via partial reallocation 1.5ºC (50%)	Scenario_8	Oil	Central	3.10467							9.05625	11.1493			3.50175	5.62175	5.78508	7.567			5.24592		3.1205
Equity via full reallocation 1.7ºC (67%)	Scenario_8	Oil	Central	0.980421							2.85987	3.52082			1.10582	1.77529	1.82687	2.38958			1.65661		0.985421
Equity via full reallocation 1.5ºC (50%)	Scenario_8	Oil	Central	4.13956							12.075	14.8657			4.669	7.49567	7.71344	10.0893			6.99456		4.16067
Cost-optimal 1.7ºC (83%)	Scenario_8	Oil	EIA	0.55606							2.14604	2.88857			0.658597	1.13922	1.18124	1.55251			1.07191		0.560612
Cost-optimal 1.5ºC (50%)	Scenario_8	Oil	EIA	1.22151							4.71426	6.34538			1.44675	2.50256	2.59485	3.41043			2.35469		1.23151
Current trends 1.7ºC (67%)	Scenario_8	Oil	EIA	0.513876							1.98324	2.66943			0.608634	1.0528	1.09163	1.43473			0.990593		0.518083
Current trends 1.5ºC (50%)	Scenario_8	Oil	EIA	2.12891							8.21629	11.0591			2.52149	4.3616	4.52246	5.94389			4.10389		2.14634
Equity via partial reallocation 1.7ºC (67%)	Scenario_8	Oil	EIA	0.737743							2.84723	3.83236			0.873782	1.51145	1.56719	2.05976			1.42214		0.743782
Equity via partial reallocation 1.5ºC (50%)	Scenario_8	Oil	EIA	3.10467							11.9821	16.1278			3.67717	6.36067	6.59525	8.66817			5.98483		3.13008
Equity via full reallocation 1.7ºC (67%)	Scenario_8	Oil	EIA	0.980421							3.78382	5.093			1.16121	2.00863	2.08271	2.73732			1.88995		0.988447
Equity via full reallocation 1.5ºC (50%)	Scenario_8	Oil	EIA	4.13956							15.9761	21.5038			4.90289	8.48089	8.79367	11.5576			7.97978		4.17344
Cost-optimal 1.7ºC (83%)	Scenario_8	Oil	Upper	0.664015							2.254	2.99652			0.766552	1.24718	1.28919	1.66046			1.17987		0.668567
Cost-optimal 1.5ºC (50%)	Scenario_8	Oil	Upper	1.45866							4.95141	6.58252			1.6839	2.7397	2.832	3.64757			2.59184		1.46866
Current trends 1.7ºC (67%)	Scenario_8	Oil	Upper	0.613641							2.08301	2.7692			0.7084	1.15257	1.19139	1.5345			1.09036		0.617848
Current trends 1.5ºC (50%)	Scenario_8	Oil	Upper	2.54223							8.6296	11.4724			2.9348	4.77491	4.93577	6.3572			4.5172		2.55966
Equity via partial reallocation 1.7ºC (67%)	Scenario_8	Oil	Upper	0.88097							2.99046	3.97558			1.01701	1.65467	1.71042	2.20299			1.56537		0.88701
Equity via partial reallocation 1.5ºC (50%)	Scenario_8	Oil	Upper	3.70742							12.5848	16.7306			4.27992	6.96342	7.198	9.27092			6.58758		3.73283
Equity via full reallocation 1.7ºC (67%)	Scenario_8	Oil	Upper	1.17076							3.97416	5.28334			1.35155	2.19897	2.27305	2.92766			2.08029		1.17879
Equity via full reallocation 1.5ºC (50%)	Scenario_8	Oil	Upper	4.94322							16.7798	22.3074			5.70656	9.28456	9.59733	12.3612			8.78344		4.97711
Cost-optimal 1.7ºC (83%)	Scenario_8	Gas	Central	0.472978							1.17205	1.66128			0.520909	0.745679	0.75361	0.837678			0.739128		0.502461
Cost-optimal 1.5ºC (50%)	Scenario_8	Gas	Central	1.0551							2.61456	3.70593			1.16203	1.66344	1.68113	1.86867			1.64882		1.12087
Current trends 1.7ºC (67%)	Scenario_8	Gas	Central	0.43544							1.07903	1.52943			0.479567	0.686498	0.6938	0.771196			0.680467		0.462583
Current trends 1.5ºC (50%)	Scenario_8	Gas	Central	1.82885							4.53191	6.42361			2.01418	2.88329	2.91396	3.23902			2.85796		1.94285
Equity via partial reallocation 1.7ºC (67%)	Scenario_8	Gas	Central	0.623471							1.54497	2.18987			0.686653	0.982941	0.993395	1.10421			0.974305		0.662335
Equity via partial reallocation 1.5ºC (50%)	Scenario_8	Gas	Central	2.49388							6.17987	8.75946			2.74661	3.93176	3.97358	4.41685			3.89722		2.64934
Equity via full reallocation 1.7ºC (67%)	Scenario_8	Gas	Central	0.831295							2.05996	2.91982			0.915537	1.31059	1.32453	1.47228			1.29907		0.883113
Equity via full reallocation 1.5ºC (50%)	Scenario_8	Gas	Central	3.42909							8.49733	12.0443			3.77659	5.40617	5.46368	6.07317			5.35867		3.64284
Cost-optimal 1.7ºC (83%)	Scenario_8	Gas	EIA	0.472978							1.56368	2.46119			0.542978	0.820543	0.831405	0.947738			0.813991		0.517633
Cost-optimal 1.5ºC (50%)	Scenario_8	Gas	EIA	1.0551							3.4882	5.49035			1.21126	1.83044	1.85467	2.11419			1.81583		1.15472
Current trends 1.7ºC (67%)	Scenario_8	Gas	EIA	0.43544							1.43958	2.26586			0.499884	0.755421	0.765421	0.872521			0.749389		0.476551
Current trends 1.5ºC (50%)	Scenario_8	Gas	EIA	1.82885							6.04622	9.5166			2.09951	3.17277	3.21477	3.66459			3.14743		2.00151
Equity via partial reallocation 1.7ºC (67%)	Scenario_8	Gas	EIA	0.623471							2.06121	3.2443			0.715744	1.08163	1.09594	1.24929			1.07299		0.682335
Equity via partial reallocation 1.5ºC (50%)	Scenario_8	Gas	EIA	2.49388							8.24485	12.9772			2.86297	4.3265	4.38377	4.99717			4.29195		2.72934
Equity via full reallocation 1.7ºC (67%)	Scenario_8	Gas	EIA	0.831295							2.74828	4.32573			0.954325	1.44217	1.46126	1.66572			1.43065		0.909779
Equity via full reallocation 1.5ºC (50%)	Scenario_8	Gas	EIA	3.42909							11.3367	17.8436			3.93659	5.94894	6.02769	6.8711			5.90144		3.75284
Cost-optimal 1.7ºC (83%)	Scenario_8	Gas	Upper	0.609293							1.69999	2.59751			0.679293	0.956859	0.967721	1.08405			0.950307		0.653949
Cost-optimal 1.5ºC (50%)	Scenario_8	Gas	Upper	1.35919							3.79229	5.79444			1.51535	2.13453	2.15876	2.41827			2.11992		1.45881
Current trends 1.7ºC (67%)	Scenario_8	Gas	Upper	0.560937							1.56507	2.39135			0.625381	0.880917	0.890917	0.998018			0.874886		0.602048
Current trends 1.5ºC (50%)	Scenario_8	Gas	Upper	2.35593							6.57331	10.0437			2.6266	3.69985	3.74185	4.19167			3.67452		2.5286
Equity via partial reallocation 1.7ºC (67%)	Scenario_8	Gas	Upper	0.80316							2.2409	3.42398			0.895432	1.26131	1.27563	1.42898			1.25268		0.862023
Equity via partial reallocation 1.5ºC (50%)	Scenario_8	Gas	Upper	3.21264							8.9636	13.6959			3.58173	5.04525	5.10253	5.71592			5.01071		3.44809
Equity via full reallocation 1.7ºC (67%)	Scenario_8	Gas	Upper	1.07088							2.98787	4.56531			1.19391	1.68175	1.70084	1.90531			1.67024		1.14936
Equity via full reallocation 1.5ºC (50%)	Scenario_8	Gas	Upper	4.41738							12.325	18.8319			4.92488	6.93722	7.01597	7.85939			6.88972		4.74113

## Sheet: 5-Carbon_budgets
		Remaining carbon budget from start of year (GtCO2)
Study	Temp	2011	2018	2020	2025	2026	Correction using Forster et al. (2025)
Welsby et al. (2021)	1.5ºC (50%)	870	580	496	287	245	0.452962
IPCC AR6 (2021)	1.7ºC (50%)	1224	934	850	640	598	0.765625
	1.5ºC (50%)	874	584	500	290	248	0.448276
	1.5ºC (67%)	774	484	400	190	148	0.421053
IEA NZE	1.5ºC (50%)	834	544	460	250	208	0.52
Forster et al. (2025)	1.7ºC (50%)	1073	783	700	490	448	--
	1.7ºC (67%)	973	683	600	390	348	--
	1.7ºC (83%)	873	583	500	290	248	--
	1.5ºC (50%)	713	423	340	130	88	--
	1.5ºC (67%)	663	373	290	80	38	--

## Sheet: 6-Committed_Emissions
		low	med	high
	Committed Emissions in 2018 (Trout et al. 2022)	880	936	992
	Gamma factors using 2018 RCBs
		low	med	high
IPCC AR6 (2021)	1.7ºC (50%)	0.94	1	1.06
	1.5ºC (50%)	1.51	1.6	1.7
	1.5ºC (67%)	1.82	1.9	2.05
IEA NZE	1.5ºC (50%)	1.62	1.7	1.82
Forster et al. (2025)	1.7ºC (50%)	1.12	1.2	1.27
	1.7ºC (67%)	1.29	1.4	1.45
	1.7ºC (83%)	1.51	1.6	1.7
	1.5ºC (50%)	2.08	2.2	2.34
	1.5ºC (67%)	2.36	2.5	2.66

## Sheet: 7-UK_oil_and_gas
Table D3 oil reserves and resources as at end 2024 in million tonnes					Table D4 gas reserves and resources as at end 2024 in billion cubic metres
Oil	1P	2P	3P		Gas	1P	2P	3P
Oil reserves	171	261	319		Oil reserves	103	148	193
Oil contingent resources	1C	2C	3C		Gas contingent resources	1C	2C	3C
Producing fields	102	130	172		Producing fields	35	62	77
Proposed new developments	140	173	200		Proposed new developments	19	28	38
Licensed marginal discoveries	44	111	247		Licensed marginal discoveries	43	95	175
Unlicensed marginal discoveries	56	156	309		Unlicensed marginal discoveries	65	139	255
Total contingent resources	343	570	928		Total contingent resources	160	324	547
Source: https://www.nstauthority.co.uk/media/hgnp1k2x/reserves-and-resources-report-2024.pdf
